1  
2  
3  
4  
5  
6  
7  
8  
9  
10  
11  
12  
13  
14  
15  
16  
17  
18  
19  
20  
21  
22  
23  
24  
25  
26  
27  
28  
29  
30

# **Accuracy and clinical effectiveness of risk prediction tools for pressure injury occurrence: An umbrella review**

Bethany Hillier<sup>1,2</sup>

Katie Scandrett<sup>1</sup>

April Coombe<sup>1</sup>

Tina Hernandez-Boussard<sup>3</sup>

Ewout Steyerberg<sup>4</sup>

Yemisi Takwoingi<sup>1,2</sup>

Vladica Velickovic<sup>5,6</sup>

Jacqueline Dinnes<sup>1,2\*</sup>

## **Affiliations**

<sup>1</sup> Department of Applied Health Sciences, College of Medicine and Health, University of Birmingham, Edgbaston, Birmingham, UK

<sup>2</sup> NIHR Birmingham Biomedical Research Centre, University Hospitals Birmingham NHS Foundation Trust and University of Birmingham, Birmingham, UK

<sup>3</sup> Department of Medicine, Stanford University, Stanford, CA USA

<sup>4</sup> Department of Biomedical Data Sciences, Leiden University Medical Center, Leiden, The Netherlands

<sup>5</sup> Evidence Generation Department, HARTMANN GROUP, Heidenheim, Germany

<sup>6</sup> Institute of Public Health, Medical, Decision Making and Health Technology Assessment, UMIT, Hall, Tirol, Austria

\* Corresponding author:

E-mail: [j.dinnes@bham.ac.uk](mailto:j.dinnes@bham.ac.uk) (JD)

## **Keywords**

Sensitivity, specificity, AUC, AUROC, prognostic model, clinical scale, pressure injury, pressure ulcer, incidence, umbrella review, overview

**NOTE: This preprint reports new research that has not been certified by peer review and should not be used to guide clinical practice.**

## 34 ABSTRACT

### 35 Background

36 Pressure injuries (PIs) pose a substantial healthcare burden and incur significant costs worldwide.  
37 Several risk prediction tools to allow timely implementation of preventive measures and a  
38 subsequent reduction in healthcare system burden are available and in use. The ability of risk  
39 prediction tools to correctly identify those at high risk of PI (prognostic accuracy) and to have a  
40 clinically significant impact on patient management and outcomes (effectiveness) is not clear.

41 We aimed to evaluate the prognostic accuracy and clinical effectiveness of risk prediction tools for PI,  
42 and to identify gaps in the literature.

### 43 Methods and Findings

44 The umbrella review was conducted according to Cochrane guidance. MEDLINE, Embase, CINAHL,  
45 EPISTEMONIKOS, Google Scholar and reference lists were searched to identify relevant systematic  
46 reviews. Methodological quality was assessed using adapted AMSTAR-2 criteria. Results were  
47 described narratively.

48 We identified 19 reviews that assessed prognostic accuracy and 11 that assessed clinical  
49 effectiveness of risk prediction tools for PI. The 19 reviews of prognostic accuracy evaluated 70 tools  
50 (39 scales and 31 machine learning models), with the Braden, Norton, Waterlow, Cubbin-Jackson  
51 scales (and modifications thereof) the most evaluated tools. Meta-analyses from a focused set of  
52 included reviews showed that the scales had sensitivities and specificities ranging from 53%-97% and  
53 46%-84%, respectively. Only 2/19 reviews performed appropriate statistical synthesis and quality  
54 assessment. Two reviews assessing machine learning based algorithms reported high prognostic  
55 accuracy estimates, but some of which were sourced from the same data within which the models  
56 were developed, leading to potentially overoptimistic results.

57 Two randomised trials assessing the effect of PI risk assessment tools (within the full test-  
58 intervention-outcome pathway) on the incidence of PIs were identified from the 11 systematic  
59 reviews of clinical effectiveness; both were included in a Cochrane review and assessed as high risk  
60 of bias. Both trials found no evidence of an effect on PI incidence.

### 61 Conclusions

62 Available systematic reviews suggest a lack of high-quality evidence for the accuracy of risk  
63 prediction tools for PI and limited reliable evidence for their use leading to a reduction in incidence  
64 of PI. Further research is needed to establish the clinical effectiveness of appropriately developed  
65 and validated risk prediction tools for PI.

66

## 67 Author Summary

### 68 Why was this study done?

- 69 • Pressure injuries (PIs) are injuries to and below the skin caused by prolonged pressure,  
70 especially on bony areas, and people who spend extensive periods in a bed or chair are  
71 particularly vulnerable.
- 72 • The majority of pressure injuries are preventable if appropriate preventive measures are put  
73 into place, but it is crucial to conduct risk stratification of individuals in order to  
74 appropriately allocate preventive measures.
- 75 • Numerous tools that give patients a score (or probability) to signify their risk of developing a  
76 PI exist. However, there is a lack of clarity on how accurate the risk scores are, and how  
77 effective the scores are at improving patient outcomes (the clinical effectiveness) when  
78 patient management is subsequently changed for patients classified as high-risk.

### 79 What did the researchers do and find?

- 80 • We conducted an umbrella review (an overview of existing systematic reviews), identifying  
81 26 systematic reviews which included 70 risk prediction tools.
- 82 • Of these 70 risk prediction tools, 31 were developed using machine learning methods, while  
83 the remainder were derived from statistical modelling and/or clinical expertise.
- 84 • Risk prediction tools demonstrated moderate to high accuracy, as measured by a variety of  
85 metrics. However, there were concerns regarding the quality of both the systematic reviews,  
86 and the primary studies included in these reviews, as reported by the systematic review  
87 authors.
- 88 • There were only two randomised controlled trials that investigated the clinical effectiveness  
89 of risk prediction tools and subsequent changes in PI management, and neither trial found  
90 that use of the tools had an impact on the incidence of PIs.

### 91 What do these findings mean?

- 92 • Whilst an abundance of risk prediction tools exists, it is unclear how accurate they are due to  
93 poor quality evidence and poor reporting, so it is difficult to recommend a particular  
94 tool/tools.
- 95 • Even if the tools are shown to be accurate, they are not useful unless they lead to  
96 improvement in patient outcomes. There is very limited evidence to determine whether the  
97 tools are clinically effective and the evidence that does exist suggests that the tools did not  
98 lead to improved patient outcomes.
- 99 • More research into the clinical effectiveness of appropriately developed and evaluated tools,  
100 when they are adopted within the clinical pathway, is needed.

## 101 INTRODUCTION

102 Pressure injuries (PI), also known as pressure ulcers or decubitus ulcers, have an estimated global  
103 prevalence of 12.8% among hospitalised adults,<sup>1</sup> and place a significant burden on healthcare  
104 systems (estimated at \$26.8 billion per year in the US alone<sup>2</sup>). PIs are most common in individuals  
105 with reduced mobility, limited sensation, poor circulation, or compromised skin integrity, and can  
106 affect those in community settings and long-term care as well as hospital settings. Effective  
107 prevention of PI requires multicomponent preventive strategies such as mattresses, overlays, and  
108 other support systems, nutritional supplementation, repositioning, dressings, creams, lotions, and  
109 cleansers.<sup>3,4</sup> Health economic models have suggested that providing baseline preventive  
110 interventions for all with daily risk assessments is more cost-effective than either a less standardised  
111 prevention protocol or a targeted risk-stratified prevention strategy.<sup>5</sup> Nevertheless, the stratification  
112 of patients by risk could further improve outcomes by allowing timely and targeted implementation  
113 of additional or greater intensity preventive measures in those most at risk, to reduce harm and  
114 consequently burden to healthcare systems.<sup>6</sup>

115 Numerous clinical assessment scales and statistical risk prediction models for assessing the risk of PI  
116 are available. However, the methodology underlying their development is not always explicit, with  
117 scales in routine clinical usage apparently based on epidemiological evidence and clinical judgment  
118 about predictors that may not meet accepted principles for the development and reporting of risk  
119 prediction models.<sup>7</sup> The Braden<sup>8,9</sup>, Norton<sup>10</sup> and Waterlow<sup>11</sup> scales are recommended by NICE  
120 guidelines<sup>12</sup> in the UK and referenced in international guidelines for PI prevention.<sup>13</sup> In some  
121 hospitals and long-term care settings in the US, healthcare professionals must conduct mandatory  
122 risk assessments for PI for all patients for the purposes of risk stratification and clinical triage. The  
123 Braden scale, developed in 1987 using a sample of 102 elderly hospital patients in the US includes  
124 sensory perception, moisture, activity, mobility, nutrition, friction and shear as predictors.<sup>8,9</sup> The  
125 Norton scale, based on a sample of 250 elderly hospital patients in the UK and published in 1962,  
126 includes physical condition, mental status, activity, mobility and continence domains.<sup>10</sup> The Waterlow  
127 scale was published in 1985 for use by Waterlow's nursing students in the UK<sup>14</sup>, and assesses BMI,  
128 assessment of the skin, gender, age, malnutrition, incontinence, mobility, tissue malnutrition,  
129 neurological deficits, major surgery or trauma and medication.<sup>11</sup>

130 Despite the apparent lack of reporting of now standard methods for development and validation  
131 (including external validation) of available risk prediction tools, there is a considerable body of  
132 evidence evaluating their clinical utility, much of which has been synthesised in systematic reviews  
133 and meta-analyses.<sup>7</sup> Clinical utility includes both prognostic accuracy and clinical effectiveness.  
134 Prognostic accuracy is estimated by applying a numeric threshold above (or below) which there is a  
135 greater risk of PI, with study results presented using accuracy metrics such as sensitivity, specificity or  
136 the area under the receiver operating characteristic (ROC) curve.<sup>15</sup> Resulting accuracy is driven not  
137 only by the nominated threshold for defining participants as at low or high risk for PI but by other  
138 study factors including population and setting.<sup>16</sup> Clinical effectiveness, or the ability of a tool to  
139 ultimately impact on health outcomes such as the incidence or severity of PI, is related both to the  
140 accuracy of the tool (or its ability to correctly identify those most likely to develop PI), to the uptake  
141 and implementation of the tool in practice and to the consequential changes in PI management  
142 based on tool predictions. Demonstrating a change in health outcomes as a result of use of a risk  
143 prediction tool is vital to encourage implementation.<sup>17</sup>

144 Using an umbrella review approach, we aimed to provide a comprehensive overview of available  
145 systematic reviews that consider the prognostic accuracy and clinical effectiveness of PI risk  
146 prediction tools.

## 147 METHODS

### 148 Protocol registration and reporting of findings

149 We followed Cochrane guidance for conducting umbrella reviews<sup>18</sup>, and ‘Preferred Reporting Items  
150 for Systematic Reviews and Meta-Analyses of Diagnostic Test Accuracy Studies’ (PRISMA-DTA)  
151 reporting guidelines<sup>19</sup> (see Appendix 1 in S1 File). The protocol was registered on Open Science  
152 Framework (<https://osf.io/tepyk>).

### 153 Literature search

154 Electronic searches of MEDLINE, Embase via Ovid and CINAHL Plus EBSCO from inception to June  
155 2024 were developed and conducted by an experienced information specialist (AC), employing well-  
156 established systematic review and prognostic search filters,<sup>20-22</sup> combined with appropriate keywords  
157 related to PIs. Simplified supplementary searches in EPISTEMONIKOS and Google Scholar were also  
158 undertaken, with the latter covering the years 2013 to June 2024 (see Appendix 2 in S1 File for  
159 further details). Screening of search results and full texts were conducted independently and in  
160 duplicate by any two from a group of four reviewers (BH, JD, YT, KS), with arbitration by a third  
161 reviewer where necessary (any one of the four reviewers not involved in the independent screening).

### 162 Eligibility criteria for this umbrella review

163 Published English-language systematic reviews of risk prediction tools developed for adult patients at  
164 risk of PI in any setting were included. Clinical risk assessment scales and models developed using  
165 statistical or machine learning (ML) methods were eligible (models exclusively using pressure sensor  
166 data were not considered). Risk prediction tools could be applied by any healthcare professional  
167 using any threshold for classifying patients as high or low risk and using any PI classification system<sup>13</sup>  
168 <sup>23-25</sup> as a reference standard. For prognostic accuracy, we required accuracy metrics, such as  
169 sensitivity and specificity, to be presented but did not require full 2x2 classification tables to be  
170 reported. Reviews on diagnosing or staging suspected or existing PIs were excluded.

171 To be considered ‘systematic’, reviews were required to report a thorough search of at least two  
172 electronic databases and at least one other indication of systematic methods (e.g. explicit eligibility  
173 criteria, formal quality assessment of included studies, adequate data presentation for  
174 reproducibility of results, or review stages (e.g. search screening) conducted independently in  
175 duplicate).

### 176 Data extraction and quality assessment

177 Data extraction forms (Appendix 3) were informed by the CHARMS checklist (CHecklist for critical  
178 Appraisal and data extraction for systematic Reviews of prediction Modelling Studies) and Cochrane  
179 Prognosis group template.<sup>26,27</sup> Data extraction items included review characteristics, number of  
180 studies and participants, study quality and results.

181 The methodological quality of included systematic reviews was assessed using an adapted version of  
182 AMSTAR-2 (A Measurement Tool to Assess Systematic Reviews).<sup>28</sup> For example, for reviews evaluating  
183 the prognostic accuracy of risk prediction tools we assessed eligibility criteria using the PIRT  
184 framework (Population, Index test, Reference standard, Target condition)<sup>29</sup> and POII framework  
185 (Population, Outcome to be predicted, Intended use of model, Intended moment in time)<sup>30</sup> and  
186 required methodological quality assessment to be conducted using validated and appropriate tools  
187 such as QUADAS<sup>31</sup>, QUADAS-2<sup>32</sup> or PROBAST<sup>33</sup>. We omitted the AMSTAR-2 item relating to  
188 publication bias (Item 15) because of the lack of empirical evidence for the effect of publication bias  
189 on test accuracy estimates, and limitations in statistical methods for identifying publication bias.<sup>19, 34</sup>  
190 Our adapted AMSTAR-2 contains six critical items, and limitations in any of these items reduces the

191 overall validity of a review.<sup>28</sup> Full details can be found in Appendix 4 in S1 File. Quality assessment  
192 and data extraction were conducted by one reviewer and checked by a second (BH, JD, KS), with  
193 disagreements resolved by consensus.

#### 194 [Synthesis methods](#)

195 Reviews about prognostic accuracy and clinical effectiveness of risk prediction tools were considered  
196 separately. Review methods and results were tabulated, and a narrative synthesis provided.  
197 Prognostic accuracy results from reviews including a statistical synthesis were tabulated according to  
198 risk prediction tool.

199 Considerable overlap in risk prediction tools and included primary studies was noted between  
200 reviews. For risk prediction tools that were included in multiple meta-analyses, we focused our  
201 synthesis on the review(s) with the most recent search date or most comprehensive (based on  
202 number of included studies) and most robust estimate of prognostic accuracy (judged according to  
203 the appropriateness of the meta-analytic method used, e.g. use of recommended hierarchical  
204 approaches for test accuracy data<sup>35</sup>). The prognostic accuracy of risk prediction tools that were  
205 included in three or fewer reviews, was reported only if an appropriate method of statistical  
206 synthesis<sup>18</sup> was used.

207 For clinical effectiveness results, reviews with the most recent search date or most comprehensive  
208 overview of available studies, that assessed PI incidence outcomes and that at least partially met  
209 more of the AMSTAR-2 criteria<sup>28</sup> were prioritised for narrative synthesis.

## 210 [RESULTS](#)

### 211 [Characteristics of included reviews](#)

212 A total of 118 records were selected for full-text assessment from 7200 unique records. We could  
213 obtain the full text of 111 publications, of which 26 reviews met all eligibility criteria (Figure 1), 19  
214 reported accuracy data<sup>36-54</sup> and 11 reported clinical effectiveness data<sup>38 42 43 49 55-61</sup> (four reported both  
215 accuracy and effectiveness data<sup>38 42 43 49</sup>). Tables 1-2 provide an overview of the characteristics,  
216 methods and methodological quality of all 26 reviews (see Appendix 5 in S1 File for full details).

217

218 *Figure 1. PRISMA flowchart: identification, screening and selection process*

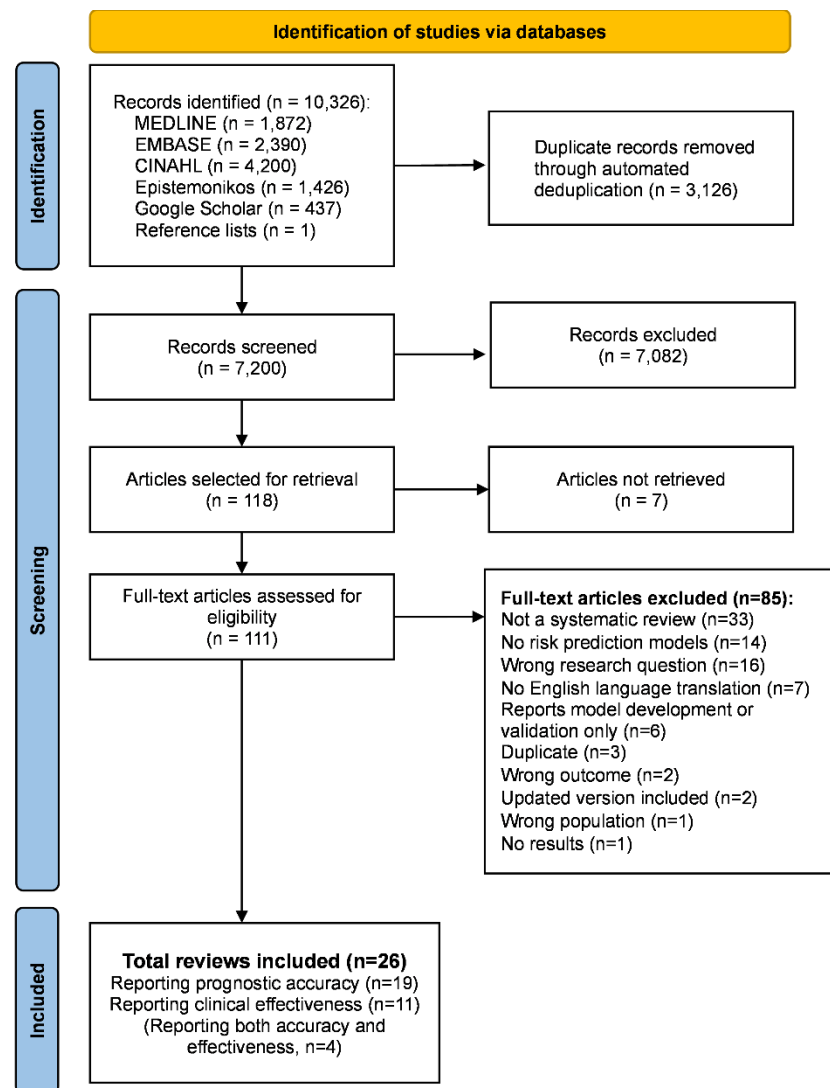

219

220 *List of full-text articles excluded, with reasons, is given in Appendix 5 in S1 File.*

221 Reviews were published between 2006 and 2024. Over half (15/26, 58%) restricted inclusion to adult  
 222 populations (Table 1), two (8%) included any age group, and nine (35%) did not report any age  
 223 restrictions. Six reviews (6/26, 23%) only included study populations with no PI at baseline. Acute  
 224 care was the most frequent setting across both review questions (7/19 (37%) accuracy reviews and  
 225 3/11 (27%) effectiveness reviews). Quality assessment tools included QUADAS-2 (n=8) or QUADAS  
 226 (n=2) in more than half of reviews of accuracy (10/19, 53%). One review<sup>47</sup> utilised and reported  
 227 PROBAST assessments for risk of bias. Another review<sup>48</sup> reported using QUADAS-2 and PROBAST  
 228 tools in their methods, but only reported QUADAS-2 results.

229 Reviews of accuracy either included studies evaluating any tool (5/19, 26%) or pre-specified tools  
 230 (10/19, 53%); two<sup>47 48</sup> included only ML-based prediction models, while the remaining two<sup>49 50</sup> did  
 231 not specify the tools to be included. A total of 70 risk prediction tools were reported across the  
 232 reviews (from one<sup>37 40 41 46 51 52</sup> to 28<sup>39</sup> tools included per review), including 31 ML models. Only two  
 233 reviews reported eligibility criteria related to the development or validation of the risk prediction  
 234 tools. One<sup>43</sup> (6%) excluded evaluation studies that used the same data that was used to develop the

235 tool and the other<sup>38</sup> included only “validated risk assessment instruments” with no further definition  
236 (yet included studies reporting original tool development).

237 The majority (15/19, 79%) of accuracy reviews conducted a meta-analysis, but only two utilised  
238 currently recommended hierarchical approaches for the meta-analysis of test accuracy data.<sup>41 53</sup> Eight  
239 reviews conducted univariate meta-analysis of individual accuracy measures (e.g. sensitivity and  
240 specificity separately, or area under the curve (AUC)<sup>50</sup>, risk ratios (RR)<sup>39</sup> or odds ratio<sup>43</sup>) and five did  
241 not clearly report the type of analysis approach used.

242 Of the 11 systematic reviews evaluating clinical effectiveness, two only considered the reliability of  
243 risk assessment scales<sup>49 58</sup>, one considered reliability and other ‘psychometric’ properties<sup>42</sup>, and eight  
244 considered effects on patient outcomes (one of which also considered tool reliability<sup>55</sup>). More than  
245 half of reviews (6, 55%) compared use of PI risk assessment scales to clinical judgement alone or  
246 ‘standard care’. The number of included studies ranged from one<sup>56</sup> to 20<sup>60</sup>, with sample sizes ranging  
247 from one (one subject and 110 raters, in an inter-rater reliability study<sup>62</sup>) to 4,137 patients. Reported  
248 outcomes included the incidence of PIs (7/11), preventive interventions prescribed (5/11) and  
249 interrater reliability (4/11), internal consistency, measurement error and convergent validity (1/11)  
250 (latter four properties reported in Appendix 5 in S1 File). One review<sup>61</sup> used the Cochrane risk of bias  
251 (RoB) tool for quality assessment of included studies, and three used JBI (n=2) or CASP (n=1) tools.  
252 Due to heterogeneity in study design, risk prediction tools and outcomes evaluated, none of the  
253 included reviews provided any form of statistical synthesis of study results.



254 *Table 1. Summary of included systematic review characteristics*

| Review characteristic                                                  | Reviews on prognostic accuracy of risk prediction tools (N=19) | Reviews on clinical effectiveness of risk prediction tools (N=11) | All included reviews (N=26) |
|------------------------------------------------------------------------|----------------------------------------------------------------|-------------------------------------------------------------------|-----------------------------|
| <b>Median (range) year of publication</b>                              | 2016 (2006 – 2024)                                             | 2015 (2006 – 2024)                                                | 2017 (2006 – 2024)          |
| <b>Eligibility criteria</b>                                            |                                                                |                                                                   |                             |
| <b>Participants</b>                                                    |                                                                |                                                                   |                             |
| Adults only                                                            | 11 (58) <sup>A</sup>                                           | 6 (55)                                                            | 15 (58) <sup>A</sup>        |
| Review states 'Any age'                                                | 1 (5)                                                          | 1 (9)                                                             | 2 (8)                       |
| No age restriction reported                                            | 7 (37)                                                         | 4 (36)                                                            | 9 (35)                      |
| <b>Presence of PI at baseline</b>                                      |                                                                |                                                                   |                             |
| Excluded those with PI at baseline <sup>B</sup>                        | 5 (26)                                                         | 2 (18)                                                            | 6 (23)                      |
| NS                                                                     | 14 (74)                                                        | 8 (73)                                                            | 20 (77)                     |
| <b>Setting</b>                                                         |                                                                |                                                                   |                             |
| Any healthcare setting                                                 | 1 (5)                                                          | 1 (9)                                                             | 2 (8)                       |
| Hospital                                                               | 3 (16)                                                         | 0 (0)                                                             | 3 (12)                      |
| Acute care (incl. surgical and ICU)                                    | 7 (37)                                                         | 3 (27)                                                            | 8 (31)                      |
| Hospital or acute care                                                 | 0 (0)                                                          | 2 (18)                                                            | 2 (8)                       |
| Long-term care                                                         | 2 (11)                                                         | 0 (0)                                                             | 2 (8)                       |
| Long-term, acute or community settings                                 | 1 (5)                                                          | 1 (9)                                                             | 1 (4)                       |
| NS                                                                     | 5 (26)                                                         | 4 (36)                                                            | 8 (31)                      |
| <b>Risk assessment tools</b>                                           |                                                                |                                                                   |                             |
| Any prediction tool or scale                                           | 5 (26)                                                         | 6 (55)                                                            | 9 (35)                      |
| Specified clinical scale(s)                                            | 10 (53)                                                        | 3 (27)                                                            | 12 (46)                     |
| ML-based prediction models                                             | 2 (11)                                                         | 0 (0)                                                             | 2 (8)                       |
| PI prevention strategies                                               | 0 (0)                                                          | 1 (9)                                                             | 1 (4)                       |
| NS                                                                     | 2 (11)                                                         | 1 (9)                                                             | 2 (8)                       |
| <b>PI classification system</b>                                        |                                                                |                                                                   |                             |
| Any PI classification system                                           | 1 (5)                                                          | 0 (0)                                                             | 1 (4)                       |
| Accepted standard classifications                                      | 1 (5)                                                          | 1 (9)                                                             | 2 (8)                       |
| Several specified classification systems (NPUAP, EPUAP, AHCP or TDCPS) | 3 (16)                                                         | 1 (9)                                                             | 3 (12)                      |
| PI stage predefined <sup>63</sup> /defined by study authors            | 1 (5)                                                          | 0 (0)                                                             | 1 (4)                       |
| NS                                                                     | 13 (68)                                                        | 9 (82)                                                            | 19 (73)                     |
| <b>Source of data</b>                                                  |                                                                |                                                                   |                             |
| Prospective only                                                       | 4 (21)                                                         | 2 (18)                                                            | 4.5 (17) <sup>C</sup>       |
| Prospective or retrospective                                           | 1 (5)                                                          | 2 (18)                                                            | 2.5 (10) <sup>C</sup>       |
| NS                                                                     | 14 (74)                                                        | 7 (64)                                                            | 19 (73)                     |
| <b>Study design restrictions</b>                                       |                                                                |                                                                   |                             |
| Yes                                                                    | 9 (47)                                                         | 7 (64)                                                            | 14 (54)                     |
| No                                                                     | 2 (11)                                                         | 2 (18)                                                            | 3 (12)                      |
| NS                                                                     | 8 (42)                                                         | 2 (18)                                                            | 9 (35)                      |
| <b>Phase of development/evaluation of tools</b>                        |                                                                |                                                                   |                             |
| Development studies (with internal/external validation NS)             | 1 (5)                                                          | N/A                                                               | N/A                         |
| External evaluations only                                              | 2 (11)                                                         | N/A                                                               | N/A                         |
| Validation studies (internal or external NS)                           | 1 (5)                                                          | N/A                                                               | N/A                         |
| NS                                                                     | 15 (79)                                                        | N/A                                                               | N/A                         |
| <b>Review methods</b>                                                  |                                                                |                                                                   |                             |
| <b>Median (range) no. sources<sup>D</sup> searched</b>                 | 6 (2 – 14)                                                     | 5 (3 – 14)                                                        | 6 (2 – 14)                  |
| <b>Publication restrictions:</b>                                       |                                                                |                                                                   |                             |

|                                                                      |                        |                     |                       |
|----------------------------------------------------------------------|------------------------|---------------------|-----------------------|
| <b>End date (year)</b>                                               |                        |                     |                       |
| 2000-2009                                                            | 1 (5)                  | 3 (27)              | 3 (12)                |
| 2010-2019                                                            | 12 (63)                | 6 (55)              | 16 (62)               |
| 2020-2023                                                            | 6 (32)                 | 2 (18)              | 7 (27)                |
| <b>Language</b>                                                      |                        |                     |                       |
| English only                                                         | 7 (37)                 | 7 (64)              | 10 (38)               |
| 2 languages                                                          | 1 (5)                  | 2 (18)              | 3 (12)                |
| >2 languages                                                         | 2 (11)                 | 2 (18)              | 3 (12)                |
| No restrictions                                                      | 3 (16)                 | 1 (9)               | 4 (15)                |
| NS                                                                   | 6 (32)                 | 0 (0)               | 6 (23)                |
| <b>Quality assessment tool <sup>E</sup></b>                          |                        |                     |                       |
| PROBAST                                                              | 1 (5) <sup>F</sup>     | N/A                 | 1 (4) <sup>F</sup>    |
| QUADAS                                                               | 2 (11)                 | N/A                 | 2 (8)                 |
| QUADAS-2                                                             | 8 (42)                 | N/A                 | 8 (31)                |
| JBI tools                                                            | 1 (5)                  | 2 (18)              | 3 (12)                |
| CASP                                                                 | 2 (11)                 | 1 (9)               | 2 (8)                 |
| Cochrane RoB tool                                                    | 0 (0)                  | 1 (9)               | 1 (4)                 |
| Other                                                                | 2 (5)                  | 5 (45)              | 6 (23)                |
| None                                                                 | 3 (16)                 | 2 (18)              | 4 (15)                |
| <b>Meta-analysis included</b>                                        | 15 (79)                | 0 (0)               | 15 (58)               |
| <b>Method of meta-analysis</b><br>(% of reviews incl. meta-analysis) |                        |                     |                       |
| Univariate RE/FE model (depending on heterogeneity assessment)       | 2 (13) <sup>G</sup>    | N/A                 | N/A                   |
| Univariate RE model                                                  | 6 (40) <sup>G</sup>    | N/A                 | N/A                   |
| Hierarchical model (for DTA studies)                                 | 2 (13)                 | N/A                 | N/A                   |
| Unclear/NS                                                           | 5 (33) <sup>G</sup>    | N/A                 | N/A                   |
| <b>Volume of evidence</b>                                            |                        |                     |                       |
| <b>Median (range) no. studies</b>                                    | 18 (2 – 70)            | 5 (1 – 20)          | 15 (1 – 70)           |
| <b>Median (range) no. participants</b>                               | 13,464 (609 – 408,504) | 1,951 (528 – 5,052) | 7,684 (528 – 408,504) |
| <b>Median (range) no. tools</b>                                      | 3 (1 – 28)             | 3 (1 – 9)           | 3 (1 – 28)            |

255 Figures are number (%) of reviews, unless otherwise specified. <sup>A</sup> one review<sup>45</sup> restricted to aged >60 years; <sup>B</sup> 'baseline'  
256 refers to beginning of study or hospital admission depending on included reviews; <sup>C</sup> one review<sup>38</sup> states either prospective  
257 or retrospective data eligible for Research Question 1, but prospective only for Research Question 2, hence 0.5 added to  
258 each category; <sup>D</sup> including databases, bibliographies or registries; <sup>E</sup> reviews may fall into multiple categories, therefore total  
259 number within domain not necessarily equal to N (100%); <sup>F</sup> another review<sup>48</sup> reported use of PROBAST in methods, but did  
260 not present any PROBAST results, therefore not included; <sup>G</sup> one review conducts univariate meta-analysis for single  
261 estimate, e.g. AUC<sup>50</sup>, RR<sup>39</sup> or OR<sup>43</sup>; AHCPR – Agency for Health Care Policy and Research; AUC – area under the curve; CASP  
262 – Critical Appraisal Skills Programme; DTA – diagnostic test accuracy; EPUAP – European Pressure Ulcer Advisory Panel; FE –  
263 fixed effects; ICU – intensive care unit; JBI – Joanna Briggs Institute; ML – machine learning; NPUAP – National Pressure  
264 Ulcer Advisory Panel; NS – not stated; OR – odds ratio; PI – pressure injury; PROBAST – Prediction model Risk of Bias  
265 Assessment; QUADAS (2) – Quality Assessment of Diagnostic Accuracy Studies (Version 2); RE – random effects; RoB – Risk  
266 of Bias; RR – risk ratio; TDCPS – Torrance Developmental Classification of Pressure Sore.  
267

268 **Methodological quality of included reviews**

269 The quality of included reviews was generally poor (Table 2; Appendix 5 in S1 File). The AMSTAR-2  
270 items that were most consistently met (yes or partial yes) were: comprehensiveness of the search  
271 (21/26, 81%), study selection independently in duplicate (17/26, 65%), data extraction in  
272 independently in duplicate (15/26, 58%), and conflicts of interest reported (20/26, 77%).

273 Six (32%) accuracy reviews<sup>36 40 41 47 48 53</sup> and two (18%) effectiveness reviews used an appropriate  
274 method of quality assessment of included studies (i.e. QUADAS or QUADAS-2 dependent on  
275 publication year, or PROBAST for accuracy and the Cochrane tool for assessing risk of bias<sup>64</sup> and  
276 criteria consistent with AHRQ Methods Guide for Effectiveness and Comparative Effectiveness  
277 Reviews<sup>65</sup> for effectiveness reviews) and also presented judgements per study. Five reviews either  
278 reported quality assessment results per study (n=4<sup>42 58-60</sup>) or were considered to use an appropriate  
279 quality assessment tool (n=1<sup>43</sup>) (AMSTAR-2 criterion partially met).

280 Of the accuracy reviews that included a statistical synthesis, 25% (4/16)<sup>39 41 50 53</sup> used an appropriate  
281 meta-analytic method and investigated sources of heterogeneity. Two reviews<sup>41 53</sup> used  
282 recommended hierarchical approaches to meta-analysis of test accuracy data (the bivariate model<sup>41</sup>  
283 and hierarchical summary ROC (HSROC) model<sup>53</sup>) and two reviews calculated summary estimates of  
284 individual measures, using random effects meta-analyses (AUC<sup>50</sup> or RR<sup>66</sup>).

285 Compared to the reviews of accuracy, reviews of effectiveness more commonly provided adequate  
286 descriptions of primary studies (8/11, 73% vs 1/19, 5%) and adequately defined their inclusion  
287 criteria (4/11, 36% vs 1/19, 5%) (Table 2). No other major differences across review questions were  
288 noted.

289 Table 2. Summary of AMSTAR-2 assessment results.

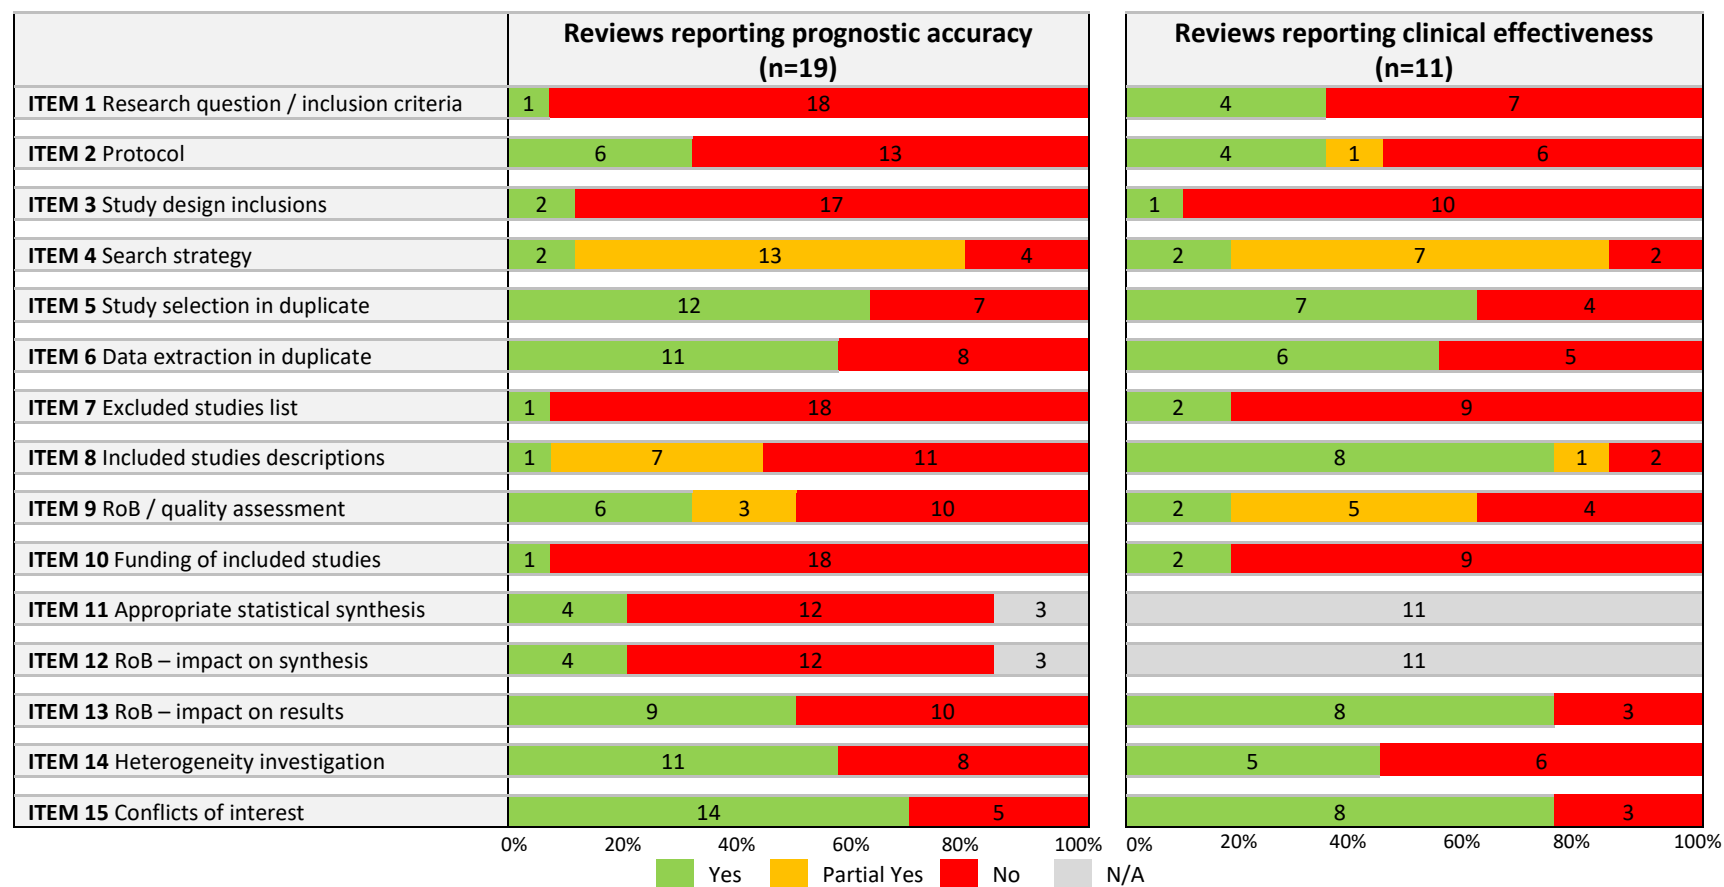

290

291 Item 1 – Adequate research question/inclusion criteria?; Item 2 – Protocol and justifications for deviations?; Item 3 – Reasons for study design inclusions?; Item 4 – Comprehensive search  
 292 strategy?; Item 5 – Study selection in duplicate?; Item 6 – Data extraction in duplicate?; Item 7 – Excluded studies list (with justifications)?; Item 8 – Included studies description adequate?;  
 293 Item 9 – Assessment of RoB/quality satisfactory?; Item 10 – Studies’ sources of funding reported?; Item 11 – Appropriate statistical synthesis method?; Item 12 – Assessment of impact of RoB  
 294 on synthesised results?; Item 13 – Assessment of impact of RoB on review results?; Item 14 – Discussion/investigation of heterogeneity?; Item 15 – Conflicts of interest reported?; N/A – Not  
 295 Applicable; RoB – Risk of Bias. Further details on AMSTAR items are given in Appendix 4 in S1 File, and results per review are given in Appendix 5 in S1 File.

## 296 Results from reviews evaluating the prognostic accuracy of risk prediction tools

297 Seven of 19 accuracy reviews were prioritised for narrative synthesis (Tables 3-4) and are reported  
298 below according to risk prediction tool. Five of the seven reviews did not include development study  
299 estimates within their meta-analyses, one review of ML models did not report this information<sup>48</sup> and  
300 one<sup>47</sup> restricted inclusion to studies reporting model development studies. The latter review was the  
301 only one to consider the effect of study quality in their statistical syntheses.

## 302 Braden, and modified Braden scales

303 The most recent and largest review<sup>41</sup> of the Braden scale (60 studies, including 49,326 patients),  
304 which used hierarchical bivariate meta-analysis, reported an overall summary sensitivity of 0.78 (95%  
305 CI 0.74, 0.82; 15,241 patients) and specificity of 0.72 (95% CI 0.66, 0.78; 34,085 patients) across all  
306 reported thresholds (range  $\leq 10$  to  $\leq 20$ ). Summary sensitivities and specificities ranged from 0.79  
307 (95% CI 0.76, 0.82) and 0.66 (95% CI 0.55, 0.75) at the lowest cut-offs for identification of high-risk  
308 patients ( $\leq 15$  in 15 studies) to 0.82 (95% CI 0.73, 0.89) and 0.70 (95% CI 0.62, 0.77) using a cut-off of  
309 18 (15 studies), respectively. Heterogeneity investigations suggested higher accuracy for predicting PI  
310 risk in patients with a mean age of 60 years or less, in hospitalised patients (compared to long-term  
311 care facility residents) and in Caucasian populations (compared to Asian populations).<sup>41</sup> The review  
312 noted a high risk of bias for the 'index test' section of the QUADAS-2 assessment in approximately a  
313 third of included studies, but failed to provide further details.

314 Two modified versions of the Braden scale<sup>67 68</sup> were included in another review.<sup>44</sup> Summary  
315 sensitivities were 0.97 (95% CI 0.92, 0.99; 125 patients from four studies)<sup>67</sup> and 0.89 (95% CI 0.71,  
316 0.98; 27 patients from two studies)<sup>68</sup>, and summary specificities were 0.70 (95% CI 0.66, 0.73; 563  
317 patients)<sup>67</sup> and 0.71 (95% CI 0.67, 0.75; 599 patients).<sup>68</sup> The review was rated critically low on the  
318 AMSTAR-2 assessment, with only 1/15 (13%) criteria fulfilled. QUADAS-2 was reportedly used but  
319 results not reported in any detail, other than to indicate that none of the included studies were  
320 considered at high risk of bias.

## 321 Cubbin & Jackson scale

322 The most recent and comprehensive review<sup>36</sup> of the Cubbin & Jackson scale (9 studies, including  
323 7,684 patients) reported summary sensitivity of 0.81 (95% CI 0.51, 0.95; 1,558 patients) and  
324 specificity of 0.76 (95% CI 0.58, 0.88; 6,126 patients). However, this review scored critically low on  
325 AMSTAR-2 (3/15, 20%, criteria fulfilled), with authors utilising inappropriate methods for statistical  
326 synthesis, not investigating causes of heterogeneity and poor reporting of results throughout. Their  
327 meta-analysis approach was also not clearly reported, but it appears that univariate meta-analyses  
328 were conducted separately for sensitivity and specificity, across studies with different Cubbin &  
329 Jackson thresholds.

330 Zhang and colleagues<sup>53</sup> included six studies evaluating the original Cubbin & Jackson scale<sup>69</sup> (800  
331 patients). Summary sensitivity and specificity were both reported as 0.84 (95% CIs 0.59, 0.95 and  
332 0.66, 0.93, respectively)<sup>53</sup> suggesting that this represents the point on the HSROC curve where  
333 sensitivity equals specificity, particularly as reported thresholds ranged from 24 to 34. The review  
334 authors concluded that although the accuracy of the Cubbin & Jackson scale was higher than the  
335 EVARUCI scale and the Braden scale, low quality of evidence and significant heterogeneity limit the  
336 strength of conclusions that can be drawn.

## 337 Norton scale

338 Park and colleagues<sup>44</sup> synthesised data from seven studies (2,899 participants) evaluating the Norton  
339 scale, across thresholds ranging from  $<14$  to  $<16$ . They reported summary sensitivity of 0.75 (95% CI  
340 0.70, 0.79) and specificity 0.57 (95% CI 0.55, 0.59). A further four reviews presented statistically

341 synthesised results for the Norton scale (Appendix 5 in S1 File), including one review by Chou and  
342 colleagues<sup>38</sup> which included nine studies (5,444 participants) but only reported median values for  
343 accuracy parameters.

#### 344 Waterlow scale

345 Although Zhang and colleagues<sup>53</sup> included the fewest participants (4 studies; 1,000 participants) of all  
346 six reviews that conducted a statistical synthesis of the accuracy of the Waterlow scale<sup>11</sup>, they  
347 provided the most recent review. It was rated highest on AMSTAR-2 criteria and appropriately used  
348 the HSROC model for meta-analysis across thresholds ranging from 12 to 25. Summary sensitivity  
349 was 0.63 (95% CI 0.48, 0.76) and summary specificity 0.46 (95% CI 0.22, 0.71) (Table 4). A second  
350 review<sup>44</sup> reported contrasting results with summary sensitivity of 0.55 (95% CI 0.49, 0.62) and  
351 specificity 0.82 (95% CI 0.80, 0.85) (6 studies; 1268 participants), however authors synthesised data  
352 across multiple thresholds without utilising hierarchical methods.

#### 353 Machine learning algorithms

354 Pei and colleagues<sup>47</sup> included 18 ML models, seven of which were not covered by any other included  
355 review. Accuracy measures were combined across all models that provided 2x2 data (n=14 models).  
356 The summary AUC across the 14 models was 0.94, summary sensitivity was 0.79 (95% CI 0.78, 0.80)  
357 and summary specificity was 0.87 (95% CI 0.88, 0.87) (Table 4). Meta-regression found no significant  
358 effect by ML algorithm or data type. Clinical heterogeneity was not investigated. The majority of  
359 studies (89%, 16/18) were considered at high risk of bias based on PROBAST. Our confidence in the  
360 review was critically low, with only 6/15 (40%) AMSTAR-2 criteria fulfilled. One critical flaw was the  
361 use of inappropriate meta-analysis methods (failing to use a hierarchical model for synthesising  
362 sensitivity and specificity).

363 Qu and colleagues<sup>48</sup> conducted separate meta-analyses of 25 studies by ML algorithm type using  
364 Bayesian hierarchical methods (Table 3). The review rated critically low on AMSTAR-2 items, with  
365 only 6/15 (40%) criteria fulfilled. The review did not restrict inclusion to external evaluations of the  
366 models, and the authors did not report which estimates were sourced from development data or  
367 external data. The summary AUC for the five algorithms ranged from 0.82 (95% CI 0.79, 0.85; 9  
368 studies with 97,815 participants) for neural network-based models to 0.95 (95% CI 0.93, 0.97; 7  
369 studies with 161,334 participants) for random forest models (Table 4).

370 The latter approach also had the highest summary specificity 0.96 (95% CI 0.80, 0.99), with sensitivity  
371 0.72 (95% CI 0.26, 0.95). The highest summary sensitivity was observed for support vector machine  
372 models (0.81, 95% CI 0.69, 0.90) with summary specificity 0.81 (95% CI 0.59, 0.93) (9 studies,  
373 152,068 participants). The remaining algorithms had summary sensitivities ranging from 0.66  
374 (decision tree models) to 0.73 (neural network models) (Table 4). Two additional ML algorithms  
375 evaluated in the included studies (Bayesian networks and LOS (abbreviation not explained)) had too  
376 few studies to allow meta-analysis (Appendix 5 in S1 File).

#### 377 Other scales

378 In addition to the risk prediction tools reported above, Zhang and colleagues<sup>53</sup> reported on the  
379 EVARUCI scale<sup>70</sup>, presenting summary sensitivity and specificity of 0.84 (95% CI 0.79, 0.89) and 0.68  
380 (95% CI 0.66, 0.70), respectively (3 studies; 3,063 participants). These results were synthesised across  
381 thresholds, 11 and 11.5 (one not reported).

382 Additional statistical syntheses covering three further modifications of the Braden scale (Braden  
383 modified by Kwong<sup>71</sup>, the 4-factor model<sup>72</sup> and 'extended Braden'<sup>72</sup>), two modified versions of the  
384 Norton scale (by Ek<sup>73</sup>, and by Bienstein<sup>74</sup>), a revised "Jackson & Cubbin"<sup>75</sup>, and the EMINA<sup>76</sup> and

385 PPS<sup>77</sup> tools ) were also identified.<sup>39 38 49</sup> These analyses showed variable performance, often with  
386 high uncertainty. Full details can be found in Table A4 in S1 File.

387 Table A5 in S1 File reports data for another 17 risk prediction tools, each associated with a single  
388 primary study (therefore not covered in detail in the text above), and another two tools,  
389 Sunderland<sup>78</sup> and RAPS<sup>79</sup>, which are assessed in two primary studies each.

Table 3. Findings related to prognostic accuracy, by model: Characteristics and quality of studies included within reviews

| Review author<br>(publication year) | Tool(s) evaluated<br>n studies;<br>N participants             | Brief description of included studies                                                                                                                                                                                                                                                                                                                                                                                                                                                                                                                | Brief description of included study quality                                                                                                                                                                                                                                                                          | Method of meta-analysis                                                                                                              |
|-------------------------------------|---------------------------------------------------------------|------------------------------------------------------------------------------------------------------------------------------------------------------------------------------------------------------------------------------------------------------------------------------------------------------------------------------------------------------------------------------------------------------------------------------------------------------------------------------------------------------------------------------------------------------|----------------------------------------------------------------------------------------------------------------------------------------------------------------------------------------------------------------------------------------------------------------------------------------------------------------------|--------------------------------------------------------------------------------------------------------------------------------------|
| Huang <sup>41</sup> (2021)          | <b>Braden</b> <sup>8,9</sup><br>n = 60; N = 49,326            | Setting: hospital (n=45; includes 22 in ICU or other acute units), LTCF (n=15)<br>Sample size: 25 to 10,098<br>Mean age: range 31.7±10.9 to 84.6±7.9<br>Design: 47 prospective, 13 retrospective<br>Braden cut-off (out of 23): range ≤10 to ≤20<br><br>Development study not included.                                                                                                                                                                                                                                                              | QUADAS-2:<br>Studies performed worst overall in the patient selection domain, with low RoB in only 18% (11/60) and high concern for applicability in 27% (16/60). The index test domain also revealed some issues, with about one-third of studies having high RoB. Studies performed well in the remaining domains. | Bivariate meta-analysis; SROC constructed; and subgroup/stratified analyses to explore heterogeneity                                 |
| Chen <sup>36</sup> (2023)           | <b>Cubbin &amp; Jackson</b> <sup>69</sup><br>n = 9; N = 7,684 | Study designs included prospective studies (n=2), a prospective and cross-sectional study (n=1), retrospective studies (n=3), an observational study (n=1), a predictive correlational study (n=1) and a longitudinal study (n=1). Studies were conducted in South Korea (n=3), the US (n=2), Turkey (n=2), China (n=1) and Portugal (n=1). Studies targeted research participants >18 years old (n=6), >16 years old (n=1), ≥21 years old (n=1) or did not set an age limit (n=1). All studies restricted to patients without PIs on ICU admission. | Authors state that " <i>none of [the 9 included studies] has a high risk of bias in any field</i> ", despite indicating some as 'high risk' in the table of QUADAS-2 results.<br><br>From table of QUADAS-2 results: 5/9 (56%) studies are at high RoB, 3/9 (33%) are at unclear RoB and 1/9 (11%) is at low RoB.    | Method unclear, but synthesised across different thresholds of Cubbin & Jackson; SROC constructed                                    |
| Zhang <sup>53</sup> (2021)          | <b>4 tools evaluated in meta-analyses</b>                     | Studies not described according to prediction tool. All prospective                                                                                                                                                                                                                                                                                                                                                                                                                                                                                  | Studies not described according to prediction tool<br>QUADAS-2: Overall judgement was "not so satisfactory".                                                                                                                                                                                                         | HSROC model for >3 studies, or univariate fixed- or random-effects models if ≤3 studies; meta-regression heterogeneity investigation |
|                                     | <b>Braden</b> <sup>8,9</sup><br>n = 18; N = 11,167            | Cut-offs used range from 10.5 to 20.<br>Development study not included.                                                                                                                                                                                                                                                                                                                                                                                                                                                                              |                                                                                                                                                                                                                                                                                                                      |                                                                                                                                      |
|                                     | <b>Cubbin &amp; Jackson</b> <sup>69</sup><br>n = 6; N = 800   | Cut-offs used range from 24 to 34.<br>Development study not included.                                                                                                                                                                                                                                                                                                                                                                                                                                                                                |                                                                                                                                                                                                                                                                                                                      |                                                                                                                                      |
|                                     | <b>EVARUCI</b> <sup>70</sup><br>n = 3; N = 3,063              | Cut-offs: >11, >11.5, NS<br>Development study not included.                                                                                                                                                                                                                                                                                                                                                                                                                                                                                          |                                                                                                                                                                                                                                                                                                                      | 'Inconsistency' (I <sup>2</sup> statistic) of studies was found to be 0%, therefore univariate fixed-effects models used             |
|                                     | <b>Waterlow</b> <sup>11</sup><br>n = 4; N = 1,000             | Cut-offs: 12, 16, <25, 20.5<br>Development study not included.                                                                                                                                                                                                                                                                                                                                                                                                                                                                                       |                                                                                                                                                                                                                                                                                                                      |                                                                                                                                      |



| <b>Review author</b><br>(publication year) | <b>Tool(s) evaluated</b><br>n studies;<br>N participants                    | <b>Brief description of included studies</b>                                                                                                                                                                                                                                                             | <b>Brief description of included study quality</b>                                     | <b>Method of meta-analysis</b>                                                                                                |
|--------------------------------------------|-----------------------------------------------------------------------------|----------------------------------------------------------------------------------------------------------------------------------------------------------------------------------------------------------------------------------------------------------------------------------------------------------|----------------------------------------------------------------------------------------|-------------------------------------------------------------------------------------------------------------------------------|
| Park <sup>45</sup> (2016b)                 | <b>3 tools evaluated</b>                                                    | Studies not described according to prediction tool<br>Cut-offs selected "by following the one which the study researcher(s) indicated to be the most effective".                                                                                                                                         |                                                                                        | DTA meta-analysis (random effects) using MetaDiSc; no further details                                                         |
|                                            | <b>Braden</b> <sup>8,9</sup><br>n = 25; N = 10,547                          | Cut-offs: 13 (n=2); 16 (n=8); 17 (n=2); 18 (n=9); 19 (n=3); 20 (n=1)<br>Development study not included.                                                                                                                                                                                                  |                                                                                        |                                                                                                                               |
|                                            | <b>Norton</b> <sup>10</sup><br>n = 5; N = 2,408                             | Cut-offs: 14 (n=2); 16 (n=3)<br>Development study not included.                                                                                                                                                                                                                                          |                                                                                        |                                                                                                                               |
|                                            | <b>Waterlow</b> <sup>11</sup><br>n = 5; N = 1,406                           | Cut-offs: 15 (n=1); 16 (n=2); 17 (n=1); NS (n=1)<br>Development study not included.                                                                                                                                                                                                                      |                                                                                        |                                                                                                                               |
| Park <sup>44</sup> (2016a)                 | <b>5 tools evaluated</b>                                                    | Described below according to prediction tool                                                                                                                                                                                                                                                             | QUADAS-2: Studies not described according to prediction tool<br>"None had 'high risk'" | DTA meta-analysis (random-effects) using MetaDiSc; Cochrane Handbook (2010) <sup>34</sup> and Walter 2002 <sup>80</sup> cited |
|                                            | <b>Braden – modified by Song &amp; Choi</b> <sup>67</sup><br>n = 4; N = 688 | Prospective (4/4), recruiting patients with no PI at baseline (hospital ward (n=2) or ICU (n=3); mean age in the 50s (n=2), 60s (n=2).<br>Classification used: AHCPR (n=3), Bergstrom (n=1).<br>Braden scale cut-off used: <21 (n=1), <23 (n=1), <24 (n=2)<br>Development study not included.            |                                                                                        |                                                                                                                               |
|                                            | <b>Braden – modified by Pang &amp; Wong</b> <sup>68</sup><br>n = 2; N = 626 | Prospective (2/2), recruiting patients with no PI at baseline (OS ward (n=1) or NS (n=1); mean age 79.4 and 54.1.<br>Classification used: NPUAP (n=2)<br>Braden scale cut-off used: <19 (n=1), <14 (n=1)<br>Development study not included.                                                              |                                                                                        |                                                                                                                               |
|                                            | <b>Cubbin &amp; Jackson</b> <sup>69</sup><br>n = 4; N = 662                 | Prospective (4/4); ICU patients for all studies (1 in surgical ICU), with no PI at baseline (n=3); mean age in the 50s (n=2), 60s (n=2).<br>Classification used: AHCPR (n=2), NPUAP (n=1), Lowthian (n=1).<br>C&J scale cut-off used: <24 (n=2), <26 (n=1), <28 (n=1)<br>Development study not included. |                                                                                        |                                                                                                                               |

| Review author<br>(publication year) | Tool(s) evaluated<br>n studies;<br>N participants                              | Brief description of included studies                                                                                                                                                                                                                                                                                                                                                                                                                                                                                                                                                                                                                                                                                                                                                                          | Brief description of included study quality                                                                                                                                                                                                                                                                                                                                                                                | Method of meta-analysis                                                                                                                                                                                                                   |
|-------------------------------------|--------------------------------------------------------------------------------|----------------------------------------------------------------------------------------------------------------------------------------------------------------------------------------------------------------------------------------------------------------------------------------------------------------------------------------------------------------------------------------------------------------------------------------------------------------------------------------------------------------------------------------------------------------------------------------------------------------------------------------------------------------------------------------------------------------------------------------------------------------------------------------------------------------|----------------------------------------------------------------------------------------------------------------------------------------------------------------------------------------------------------------------------------------------------------------------------------------------------------------------------------------------------------------------------------------------------------------------------|-------------------------------------------------------------------------------------------------------------------------------------------------------------------------------------------------------------------------------------------|
|                                     | <b>Norton</b> <sup>10</sup><br>n = 7; N = 2,899                                | Prospective (6/7); inpatients with no PI at baseline (1 LTC, 2 'hospital', 1 ICU, 1 ICU & wards); mean age in the 50s (n=1), 60s (n=3), or 80s (n=1), or NS (n=2).<br>Classification used: AHCPR (n=3), NPUAP (n=2), EPUAP (n=1), TDCPS (n=1).<br>Norton scale cut-off used: <14 (n=2, but reported as 3 in paper), <15 (n=2), <16 (n=3)<br>Development study not included.                                                                                                                                                                                                                                                                                                                                                                                                                                    |                                                                                                                                                                                                                                                                                                                                                                                                                            |                                                                                                                                                                                                                                           |
|                                     | <b>Waterlow</b> <sup>11</sup><br>n = 6; N = 1,268                              | Prospective (6/6); all male* inpatients aged over 60 on average with no PI at baseline (3 included ICU patients).<br>Classification used: AHCPR (n=2), NPUAP (n=2), EPUAP (n=1), TDCPS (n=1).<br>Waterlow scale cut-off used: <9 (n=1), <15 (n=1), <16 (n=2), <17 (n=1), NS (n=1)<br>Development study not included.                                                                                                                                                                                                                                                                                                                                                                                                                                                                                           |                                                                                                                                                                                                                                                                                                                                                                                                                            |                                                                                                                                                                                                                                           |
| Pei <sup>47</sup> (2023)            | <b>Various ML models</b><br>n = 14; N = 408,504                                | Studies published from 2012-2022; studies conducted in China (n=4), Taiwan (n=3), USA (n=6), Germany (n=1), Japan (n=1), Australia (n=1), Spain (n=1) and Czech Republic (n=1); 15 studies utilised retrospective data, while 3 used prospective data; studies focused on adult ICU inpatients (n=5), hospitalised patients (n=8), adult hospitalised patients awaiting surgery (n=3), cancer patients (n=1) and end-of-life adult inpatients (n=1); sample size range 168-149,006; number of patients with PI range 8-4663<br><br>Validation methods: both sample splitting and k-fold cross-validation (n= 10), sample splitting only (n=4), k-fold cross-validation only (n=1). External verification conducted (n=1). Validation methods not reported (n=2). Handling of missing data not disclosed (n=7). | PROBAST:<br><br>Overall, 16/18 (88.9%) papers were at high RoB, 1 (5.6%) was at unclear RoB and only 1 (5.6%) was at low RoB.<br><br>14 (77.8%) studies were at high RoB in the analysis domain. The most common factors contributing to the high risk of bias in the analysis domain included an inadequate number of events per candidate predictor, poor handling of missing data and failure to deal with overfitting. | Meta-analysis conducted for the 14 studies that presented 2x2 information; DTA meta-analysis (random-effects) using MetaDiSc (no further details); SROC constructed; meta-regression heterogeneity investigation (only p-values reported) |
| Qu <sup>48</sup> (2022)             | Models by ML algorithm type<br><br><b>Decision Tree</b><br>n = 14; N = 118,292 | Characteristics only reported overall, not by algorithm type.                                                                                                                                                                                                                                                                                                                                                                                                                                                                                                                                                                                                                                                                                                                                                  | 2/14 high RoB; 10/14 low RoB; 2/14 unclear RoB                                                                                                                                                                                                                                                                                                                                                                             | RevMan (Moses & Littenberg method <sup>81,82</sup> ) for analysis of quantitative data (SROC plot)                                                                                                                                        |

| <b>Review author</b><br>(publication year) | <b>Tool(s) evaluated</b><br>n studies;<br>N participants | <b>Brief description of included studies</b>                                                                                                                                                                                   | <b>Brief description of included study quality</b> | <b>Method of meta-analysis</b>  |
|--------------------------------------------|----------------------------------------------------------|--------------------------------------------------------------------------------------------------------------------------------------------------------------------------------------------------------------------------------|----------------------------------------------------|---------------------------------|
|                                            | <b>Logistic Regression</b><br>n = 14; N = 195,927        | Conducted in: hospital patients (n= 13); surgical patients (n=3), ICU (n=5), CVD patients (n=2), cancer patients (n=1), LTC (n=1)<br>Unclear whether development, internal validation or external validation studies included. | 4/14 high RoB; 9/14 low RoB; 1/14 unclear RoB      | presented) and Bayesian DTA-NMA |
|                                            | <b>Neural Network</b><br>n = 9; N = 97,815               |                                                                                                                                                                                                                                | 1/9 high RoB; 7/9 low RoB; 1/9 unclear RoB         |                                 |
|                                            | <b>Random Forest</b><br>n = 7; N = 161,334               |                                                                                                                                                                                                                                | 1/7 high RoB; 6/7 low RoB.                         |                                 |
|                                            | <b>Support Vector Machine</b><br>n = 9; N = 152,068      |                                                                                                                                                                                                                                | 1/9 high RoB; 8/9 low RoB.                         |                                 |

391 \* as reported in review's text. However, the table reports a mixture of female and male participants for all studies, with a mean female proportion of 50.73%.

392 AHCPR – Agency for Health Care Policy and Research; CI – confidence interval; CVD – cardiovascular disease; DTA – diagnostic test accuracy; EPUAP – European Pressure Ulcer Advisory Panel;

393 (H)SROC – (hierarchical) summary receiver operating characteristic curve; ICU – intensive care unit; LTC(F) – long-term care (facility); ML – machine learning; N – number of participants; n –

394 number of studies; NMA – network meta-analysis; NS – not stated; NPUAP – National Pressure Ulcer Advisory Panel; PI – pressure injury; PPU – Panel for the Prediction and Prevention of

395 Pressure Ulcers; QUADAS – Quality Assessment of Diagnostic Accuracy Studies; RoB – risk of bias; TDCPS – Torrance Developmental Classification of Pressure Sore.

Table 4. Summary estimates of accuracy parameters (main results from statistical syntheses), by prediction tool

| Review author<br>(publication year)                                                           | n studies;<br>N participants | Sensitivity (95% CI)<br>(N = no. participants with PI)                                                                                                                                                                              | Specificity (95% CI)<br>(N = no. participants without<br>PI)                                                                                                                                       | Likelihood ratios (95% CI)                                                           | DOR (95% CI)                                                                                                                                                                                    | AUROC (95% CI)                                                                                                                                                                         |
|-----------------------------------------------------------------------------------------------|------------------------------|-------------------------------------------------------------------------------------------------------------------------------------------------------------------------------------------------------------------------------------|----------------------------------------------------------------------------------------------------------------------------------------------------------------------------------------------------|--------------------------------------------------------------------------------------|-------------------------------------------------------------------------------------------------------------------------------------------------------------------------------------------------|----------------------------------------------------------------------------------------------------------------------------------------------------------------------------------------|
| <b>TOOL: Braden<sup>8,9</sup> (1987)</b>                                                      |                              |                                                                                                                                                                                                                                     |                                                                                                                                                                                                    |                                                                                      |                                                                                                                                                                                                 |                                                                                                                                                                                        |
| Huang <sup>41</sup> (2021)                                                                    | n = 60;<br>N = 49,326        | <b>0.78 (0.74, 0.82)<sup>A</sup></b><br>N=15,241<br><br>By cut-off:<br>≤15 (n=15): 0.79 (0.76, 0.82)<br>16 (n=19): 0.75 (0.67, 0.82)<br>17 (n=4): 0.69 (0.61, 0.76)<br>18 (n=15): 0.82 (0.73, 0.89)<br>≥19 (n=7): 0.78 (0.65, 0.87) | <b>0.72 (0.66, 0.78)<sup>A</sup></b><br>N=34,085<br><br>By cut-off:<br>≤15: 0.66 (0.55, 0.75)<br>16: 0.85 (0.70, 0.93)<br>17: 0.86 (0.50, 0.97)<br>18: 0.70 (0.62, 0.77)<br>≥19: 0.54 (0.44, 0.63) | <b>PLR 2.80 (2.30, 3.50)<sup>A</sup></b><br><b>NLR 0.30 (0.26, 0.35)<sup>A</sup></b> | <b>9.00 (7.00, 13.00)<sup>A</sup></b><br><br>By cut-off:<br>≤15: 7.00 (4.00, 12.00)<br>16: 17.00 (8.00, 36.00)<br>17: 14.00 (2.00, 103.00)<br>18: 11.00 (6.00, 20.00)<br>≥19: 4.00 (2.00, 7.00) | <b>0.82 (0.79, 0.85)<sup>A</sup></b><br><br>By cut-off:<br>≤15: 0.80 (0.76, 0.83)<br>16: 0.84 (0.80, 0.87)<br>17: 0.73 (0.69, 0.77)<br>18: 0.83 (0.79, 0.86)<br>≥19: 0.67 (0.63, 0.71) |
| Zhang <sup>53</sup> (2021)                                                                    | n = 18;<br>N = 11,167        | <b>0.78 (0.68, 0.85)<sup>B</sup></b>                                                                                                                                                                                                | <b>0.61 (0.40, 0.79)<sup>B</sup></b>                                                                                                                                                               | <b>PLR 2.00 (1.24, 3.24)</b><br><b>NLR 0.36 (0.25, 0.52)</b>                         | <b>5.52 (2.61, 11.67)</b>                                                                                                                                                                       | <b>0.78</b>                                                                                                                                                                            |
| Park <sup>45</sup> (2016b)                                                                    | n = 25;<br>N = 10,547        | <b>0.72 (0.69, 0.74)<sup>A</sup></b>                                                                                                                                                                                                | <b>0.63 (0.62, 0.64)<sup>A</sup></b>                                                                                                                                                               | <b>PLR 2.31 (1.98, 2.69)<sup>A</sup></b><br><b>NLR 0.43 (0.36, 0.51)<sup>A</sup></b> | <b>6.50 (4.64, 9.11)<sup>A</sup></b>                                                                                                                                                            | <b>0.79<sup>A</sup></b><br>(SE = 0.02)                                                                                                                                                 |
| <b>TOOL: Modified Braden scales: Braden – modified by Song &amp; Choi<sup>67</sup> (1991)</b> |                              |                                                                                                                                                                                                                                     |                                                                                                                                                                                                    |                                                                                      |                                                                                                                                                                                                 |                                                                                                                                                                                        |
| Park <sup>44</sup> (2016a)                                                                    | n = 4;<br>N = 688            | <b>0.97 (0.92, 0.99)<sup>A</sup></b><br>N=125                                                                                                                                                                                       | <b>0.70 (0.66, 0.73)<sup>A</sup></b><br>N=563                                                                                                                                                      | <b>PLR 3.47 (1.33, 9.06)<sup>A</sup></b><br><b>NLR 0.08 (0.04, 0.19)<sup>A</sup></b> | <b>56.56 (21.88, 146.21)<sup>A</sup></b>                                                                                                                                                        | <b>0.95<sup>A</sup></b><br>(SE 0.02)                                                                                                                                                   |
| <b>TOOL: Braden – modified by Pang &amp; Wong<sup>68</sup> (1998)</b>                         |                              |                                                                                                                                                                                                                                     |                                                                                                                                                                                                    |                                                                                      |                                                                                                                                                                                                 |                                                                                                                                                                                        |
| Park <sup>44</sup> (2016a)                                                                    | n = 2;<br>N = 626            | <b>0.89 (0.71, 0.98)<sup>A</sup></b><br>N=27                                                                                                                                                                                        | <b>0.71 (0.67, 0.75)<sup>A</sup></b><br>N=599                                                                                                                                                      | <b>PLR 2.87 (1.88, 4.38)<sup>A</sup></b><br><b>NLR 0.17 (0.06, 0.49)<sup>A</sup></b> | <b>16.06 (4.75, 54.35)<sup>A</sup></b>                                                                                                                                                          | Not calculated                                                                                                                                                                         |
| <b>TOOL: Cubbin &amp; Jackson<sup>69</sup> (1991)</b>                                         |                              |                                                                                                                                                                                                                                     |                                                                                                                                                                                                    |                                                                                      |                                                                                                                                                                                                 |                                                                                                                                                                                        |
| Chen <sup>36</sup> (2023)                                                                     | n = 9;<br>N = 7,684          | <b>0.81 (0.51, 0.95)</b><br>N=1,558                                                                                                                                                                                                 | <b>0.76 (0.58, 0.88)</b><br>N=6,126                                                                                                                                                                | <b>PLR 3.34 (2.14, 5.21)</b><br><b>NLR 0.25 (0.09, 0.68)</b>                         | <b>13.24 (5.41, 32.40)</b>                                                                                                                                                                      | <b>0.84 (0.81, 0.87)</b>                                                                                                                                                               |
| Zhang <sup>53</sup> (2021)                                                                    | n = 6;<br>N = 800            | <b>0.84 (0.59, 0.95)<sup>B</sup></b>                                                                                                                                                                                                | <b>0.84 (0.66, 0.93)<sup>B</sup></b>                                                                                                                                                               | <b>PLR 5.12 (2.70, 9.70)</b><br><b>NLR 0.19 (0.08, 0.49)</b>                         | <b>26.45 (13.51, 51.78)</b>                                                                                                                                                                     | <b>0.90</b>                                                                                                                                                                            |
| Park <sup>44</sup> (2016a)                                                                    | n = 4;<br>N = 662            | <b>0.67 (0.60, 0.74)<sup>A</sup></b><br>N=194                                                                                                                                                                                       | <b>0.75 (0.71, 0.79)<sup>A</sup></b><br>N=468                                                                                                                                                      | <b>PLR 2.80 (1.66, 4.72)<sup>A</sup></b><br><b>NLR 0.34 (0.15, 0.76)<sup>A</sup></b> | <b>9.46 (2.41, 37.22)<sup>A</sup></b>                                                                                                                                                           | <b>0.82<sup>A</sup></b><br>(SE 0.06)                                                                                                                                                   |
| <b>TOOL: EVARUCI<sup>70</sup> (2001)</b>                                                      |                              |                                                                                                                                                                                                                                     |                                                                                                                                                                                                    |                                                                                      |                                                                                                                                                                                                 |                                                                                                                                                                                        |
| Zhang <sup>53</sup> (2021)                                                                    | n = 3;<br>N = 3,063          | <b>0.84 (0.79, 0.89)<sup>A</sup></b>                                                                                                                                                                                                | <b>0.68 (0.66, 0.70)<sup>A</sup></b>                                                                                                                                                               | <b>PLR 2.32 (2.14, 2.51)<sup>A</sup></b><br><b>NLR 0.25 (0.19, 0.35)<sup>A</sup></b> | <b>9.79 (6.81, 14.07)<sup>A</sup></b>                                                                                                                                                           | <b>0.82<sup>A</sup></b>                                                                                                                                                                |
| <b>TOOL: Norton<sup>10</sup> (1962)</b>                                                       |                              |                                                                                                                                                                                                                                     |                                                                                                                                                                                                    |                                                                                      |                                                                                                                                                                                                 |                                                                                                                                                                                        |
| Park <sup>44</sup> (2016a)                                                                    | n = 7;<br>N = 2,899          | <b>0.75 (0.70, 0.79)<sup>A</sup></b><br>N=383                                                                                                                                                                                       | <b>0.57 (0.55, 0.59)<sup>A</sup></b><br>N=2,516                                                                                                                                                    | <b>PLR 1.77 (1.26, 2.50)<sup>A</sup></b><br><b>NLR 0.49 (0.32, 0.76)<sup>A</sup></b> | <b>7.57 (2.53, 22.64)<sup>A</sup></b>                                                                                                                                                           | <b>0.82<sup>A</sup></b><br>(SE 0.05)                                                                                                                                                   |
| Park <sup>45</sup> (2016b)                                                                    | n = 5;<br>N = 2,408          | <b>0.76 (0.71, 0.80)<sup>A</sup></b>                                                                                                                                                                                                | <b>0.55 (0.53, 0.57)<sup>A</sup></b>                                                                                                                                                               | <b>PLR 1.58 (1.07, 2.34)<sup>A</sup></b><br><b>NLR 0.47 (0.29, 0.76)<sup>A</sup></b> | <b>6.41 (1.72, 23.88)<sup>A</sup></b>                                                                                                                                                           | <b>0.84<sup>A</sup></b><br>(SE 0.07)                                                                                                                                                   |

| Review author<br>(publication year)           | n studies;<br>N participants | Sensitivity (95% CI)<br>(N = no. participants with PI) | Specificity (95% CI)<br>(N = no. participants without<br>PI) | Likelihood ratios (95% CI)                                                             | DOR (95% CI)                           | AUROC (95% CI)                        |
|-----------------------------------------------|------------------------------|--------------------------------------------------------|--------------------------------------------------------------|----------------------------------------------------------------------------------------|----------------------------------------|---------------------------------------|
| <b>TOOL: Waterlow<sup>11</sup> (1985)</b>     |                              |                                                        |                                                              |                                                                                        |                                        |                                       |
| Zhang <sup>53</sup> (2021)                    | n = 4;<br>N = 1,000          | <b>0.63 (0.48, 0.76)</b> <sup>B</sup>                  | <b>0.46 (0.22, 0.71)</b> <sup>B</sup>                        | PLR <b>1.16 (0.66, 2.01)</b><br>NLR <b>0.82 (0.40, 1.67)</b>                           | <b>1.42 (0.40, 5.07)</b>               | <b>0.56</b>                           |
| Park <sup>44</sup> (2016a)                    | n = 6;<br>N = 1,268          | <b>0.55 (0.49, 0.62)</b> <sup>A</sup><br>N=246         | <b>0.82 (0.80, 0.85)</b> <sup>A</sup><br>N=1,222             | PLR <b>2.89 (1.74, 4.79)</b> <sup>A</sup><br>NLR <b>0.46 (0.31, 0.70)</b> <sup>A</sup> | <b>9.22 (6.43, 13.23)</b> <sup>A</sup> | <b>0.82</b> <sup>A</sup><br>(SE 0.03) |
| Park <sup>45</sup> (2016b)                    | n = 5;<br>N = 1,406          | <b>0.53 (0.47, 0.60)</b> <sup>A</sup>                  | <b>0.84 (0.81, 0.86)</b> <sup>A</sup>                        | PLR <b>3.09 (1.63, 5.83)</b> <sup>A</sup><br>NLR <b>0.49 (0.34, 0.72)</b> <sup>A</sup> | <b>9.06 (6.30, 13.04)</b> <sup>A</sup> | <b>0.81</b> <sup>A</sup><br>(SE 0.03) |
| <b>ML models:<sup>C</sup></b>                 |                              |                                                        |                                                              |                                                                                        |                                        |                                       |
| Pei <sup>47</sup> (2023)<br>Various ML models | n = 14;<br>N = 328,789       | <b>0.79 (0.78, 0.80)</b><br>N=18,807                   | <b>0.87 (0.88, 0.87)</b><br>N=309,982                        | PLR <b>10.71 (5.98, 19.19)</b><br>NLR <b>0.21 (0.08, 0.50)</b>                         | <b>52.39 (24.83, 110.55)</b>           | <b>0.94</b>                           |
| Qu <sup>48</sup> (2022)<br>DT models          | n = 14;<br>N = 118,292       | <b>0.66 (0.42, 0.84)</b><br>N=7,557                    | <b>0.90 (0.78, 0.96)</b><br>N=110,735                        | PLR <b>6.9 (3.2, 14.7)</b><br>NLR <b>0.37 (0.20, 0.69)</b>                             | <b>18 (7, 49)</b>                      | <b>0.88 (0.85, 0.91)</b>              |
| Qu <sup>48</sup> (2022)<br>LR models          | n = 14;<br>N = 195,927       | <b>0.71 (0.60, 0.80)</b><br>N=9046                     | <b>0.83 (0.75, 0.89)</b><br>N=186,881                        | PLR <b>4.3 (3.1, 5.9)</b><br>NLR <b>0.35 (0.26, 0.46)</b>                              | <b>12 (9, 17)</b>                      | <b>0.84 (0.81, 0.87)</b>              |
| Qu <sup>48</sup> (2022)<br>NN models          | n = 9;<br>N = 97,815         | <b>0.73 (0.55, 0.86)</b><br>N=9488                     | <b>0.78 (0.65, 0.87)</b><br>N=88,327                         | PLR <b>3.3 (2.1, 5.0)</b><br>NLR <b>0.35 (0.21, 0.59)</b>                              | <b>9 (5, 19)</b>                       | <b>0.82 (0.79, 0.85)</b>              |
| Qu <sup>48</sup> (2022)<br>RF models          | n = 7;<br>N = 161,334        | <b>0.72 (0.26, 0.95)</b><br>N=5486                     | <b>0.96 (0.80, 0.99)</b><br>N=155,848                        | PLR <b>16.3 (2.4, 108.9)</b><br>NLR <b>0.29 (0.07, 1.29)</b>                           | <b>56 (3, 1258)</b>                    | <b>0.95 (0.93, 0.97)</b>              |
| Qu <sup>48</sup> (2022)<br>SVM models         | n = 9;<br>N = 152,068        | <b>0.81 (0.69, 0.90)</b><br>N=6562                     | <b>0.81 (0.59, 0.93)</b><br>N=145,506                        | PLR <b>4.3 (1.8, 9.9)</b><br>NLR <b>0.23 (0.13, 0.39)</b>                              | <b>19 (6, 54)</b>                      | <b>0.88 (0.85, 0.90)</b>              |

397 <sup>A</sup> summary statistic across multiple thresholds; <sup>B</sup> estimate derived from HSROC, but method for choosing summary point unclear; <sup>C</sup> it is not reported, at review level, whether the results from  
398 the Qu review<sup>48</sup> include data from development, internal validation or external validation/evaluation studies.  
399 AUROC – area under the receiver operating characteristic curve; CI – confidence interval; DT – decision tree; DOR – diagnostic odds ratio; HSROC – hierarchical summary receiver operating  
400 characteristic curve; LR – logistic regression; ML – machine learning; NLR – negative likelihood ratio; NN – neural network; NS – not stated; PLR – positive likelihood ratio; RF – random forest;  
401 SE – standard error; SVM – support vector machine.

## 402 Results from reviews evaluating the clinical effectiveness of risk prediction tools

403 The 11 reviews reporting clinical effectiveness, used a range of eligibility criteria and a number of  
404 different quality assessment tools, leading to varying conclusions about the methodological quality  
405 of the same studies across reviews. Given the overlap in study inclusion between reviews Table 5  
406 provides an overview of results from four<sup>38 57 59 61</sup> of the 11 reviews, and a summary of the included  
407 comparative studies is provided below.

408 Two randomised controlled trials (RCTs) of risk prediction tools<sup>83 84</sup> were identified, both of which  
409 were considered at high risk of bias in the Cochrane review (assessed using the Cochrane RoB tool<sup>64</sup>).  
410 One of the trials (an individually randomised study<sup>83</sup>) was included in a further three reviews which  
411 considered it to be 'good quality'<sup>38</sup>, 'valid'<sup>56</sup>, or 'high quality'<sup>59</sup>. The trial was conducted in 1,231  
412 hospital inpatients and the only intervention was that the staff must use the tool that was allocated  
413 to them, with no other protocol prescribed changes made to routine care. However, no evidence of a  
414 difference in PI incidence was found between patients assessed with either the Waterlow scale or  
415 Ramstadius tool compared with clinical judgment alone (RR 1.10 (95% CI 0.68, 1.81) and RR 0.79  
416 (95% CI 0.46, 1.35), respectively). The trial further showed no evidence of a difference in patient  
417 management or in PI severity when using a risk assessment tool compared to clinical judgement.

418 A further cluster randomised trial<sup>84</sup> was considered to be of poor methodological quality both in the  
419 Cochrane review<sup>38</sup> and one other review<sup>61</sup>. The trial included 521 patients at a military hospital and  
420 compared nurse training with mandatory use of the Braden scale, to nurse training and optional use  
421 of the Braden scale, to no training. No evidence of a difference in PI incidence was observed between  
422 the three groups: incidence rates were 22%, 22% and 15% (p=0.38), respectively.

423 Two reviews by Lovegrove and colleagues<sup>59 60</sup> included an uncontrolled comparison study<sup>85</sup> rated as  
424 high quality<sup>59</sup>. The study compared the clinical effectiveness of the Maelor scale<sup>86</sup> used in an Irish  
425 hospital (121 patients) with nurses' clinical judgement at a Norwegian hospital (59 patients). A higher  
426 rate of preventive strategies, as well as a lower PI prevalence (12% vs. 54%), was reported for the  
427 Irish hospital. However, these results are likely to be highly confounded by inherent differences  
428 in population and setting.

429 A non-randomised study by Gunningberg and colleagues<sup>87</sup> included in two reviews<sup>43 57</sup> was  
430 considered by review authors to be of relatively high quality. The study was conducted in 124  
431 patients in emergency and orthopaedic units and compared the use of a PI risk alarm sticker for  
432 patients with a modified Norton Score of <21 (indicating high-risk patients) to standard care. No  
433 significant difference in the incidence of PIs between the Norton scale and standard care groups was  
434 observed.

435 A non-randomised study<sup>88</sup> conducted in 233 hospice inpatients was included in three reviews,<sup>38 43 57</sup>  
436 one of which is reported in Table 5.<sup>57</sup> The study met six of eight quality criteria used by Health  
437 Quality Ontario.<sup>57</sup> Use of a modified version of the Norton scale (Norton modified by Bale), in  
438 conjunction with standardised use of preventive interventions based on risk score, was found to be  
439 associated with lower risk of PIs when compared with nurses' clinical judgment alone (RR 0.11, 95%  
440 CI 0.03, 0.46). The lack of randomisation limits the reliability of this result, and review authors report  
441 that the modified Norton scale had not been validated.

442 Finally, a 'before-and-after' study<sup>89</sup> of 181 patients in various hospital settings was included in two  
443 reviews,<sup>43 57</sup> one of which considered the study to meet all quality criteria.<sup>57</sup> Use of the Norton scale  
444 with additional training for staff was associated with significant differences in the number of  
445 preventive interventions prescribed compared to standard care (18.96 vs. 10.75, respectively).

446 Preventive interventions were also introduced earlier in the intervention group (on day 1, 61% vs.  
447 50%,  $p < 0.002$  for Norton and usual care, respectively). However, no significant difference in the  
448 incidence of PIs was detected between the groups.

Table 5. Systematic reviews evaluating clinical effectiveness

| Review author (publication year) | Tools included                                        | Setting of included studies; study design; sample size                                                                                                                                                                        | Included outcomes                                                                                                                        | Brief description of study quality                                                                                                                                                                                                                                                                                            | Relevant results from included studies                                                                                                                                                                                                                                                                                                                                                                                                                                                                                                                                                                                                                                                                                                                                         |
|----------------------------------|-------------------------------------------------------|-------------------------------------------------------------------------------------------------------------------------------------------------------------------------------------------------------------------------------|------------------------------------------------------------------------------------------------------------------------------------------|-------------------------------------------------------------------------------------------------------------------------------------------------------------------------------------------------------------------------------------------------------------------------------------------------------------------------------|--------------------------------------------------------------------------------------------------------------------------------------------------------------------------------------------------------------------------------------------------------------------------------------------------------------------------------------------------------------------------------------------------------------------------------------------------------------------------------------------------------------------------------------------------------------------------------------------------------------------------------------------------------------------------------------------------------------------------------------------------------------------------------|
| Lovegrove <sup>59</sup> (2021)   | Braden; Maelor score; Norton; Ramstadius; Waterlow    | Acute care hospital n=1, inpatient units n=1, ICU n=1, internal medicine and oncology wards n=1;<br><br>Design: cross-sectional survey n=2, RCT n=1, observational inter-rater reliability n=1;<br><br>Sample size 45 to 1231 | PI risk scores; PI incidence; PI preventive interventions; interrater reliability (reliability results covered in Appendix 5 in S1 File) | RoB assessed using JBI tools or analytical cross-sectional study appraisal checklist. The RCT was judged as high quality. Of the remaining studies, two were judged as high quality and one as moderate quality; inclusion criteria not clearly stated and no strategies to deal with confounding.                            | <ul style="list-style-type: none"> <li>• There were no differences in patient management ('pressure care plan' and use of a special mattress) based on PI risk assessment method (clinical judgement, Ramstadius tool or Waterlow score). PI incidence difference between groups not significant (<math>p=0.44</math>) (Webster 2011<sup>83</sup>).</li> <li>• A hospital that used the Maelor scale reported a higher rate of PI preventive strategies, and a lower PI prevalence (12% vs. 54%), than a site that used nurses' clinical judgement (Moore 2015<sup>85</sup>).</li> </ul>                                                                                                                                                                                       |
| Moore <sup>61</sup> (2019)       | Braden; Waterlow; Ramstadius                          | Military hospital n=1, internal medicine and oncology wards n=1;<br><br>Design: RCT n=1, cluster randomised trial n=1;<br><br>Sample sizes 286 and 1231                                                                       | PI incidence; severity of PIs                                                                                                            | RoB assessed using Cochrane tool (Higgins 2011 <sup>64</sup> ). Both studies at high RoB due to blinding issues. One study at RoB also due to baseline imbalance and incorrect analyses.                                                                                                                                      | <ul style="list-style-type: none"> <li>• No differences in PI incidence when using Braden scale or clinical judgement (Braden vs. clinical judgement+training, RR 0.97, 95% CI 0.53, 1.77; Braden vs clinical judgement RR 1.43, 95% CI 0.77, 2.68) (Saleh 2009<sup>84</sup>).</li> <li>• No difference in PI incidence when using a risk assessment tool compared to clinical judgement (RR 1.10, 95% CI 0.68, 1.81 and RR 0.79, 95% CI 0.46, 1.35, for Waterlow and Ramstadius respectively) (Webster 2011<sup>83</sup>).</li> <li>• No difference in PI severity based on risk assessment tools vs. clinical judgement (Webster 2011<sup>83</sup>).</li> </ul>                                                                                                              |
| Chou <sup>38</sup> (2013)        | Norton modified by Bale; Braden; Waterlow; Ramstadius | Hospital n=2, hospice n=1;<br><br>Design: non-randomised n=1, cluster randomised trial n=1, RCT n=1;<br><br>Sample size 240 to 1231                                                                                           | PI incidence, severity of PIs; PI preventive interventions                                                                               | RoB assessed with criteria consistent with AHRQ Methods Guide for Effectiveness and Comparative Effectiveness Reviews. One RCT was rated as good quality and the other as poor due to randomisation and blinding issues. The cohort study was rated as poor; there were blinding issues and confounding was not investigated. | <ul style="list-style-type: none"> <li>• No difference in PI incidence when using a risk assessment tool compared to clinical judgement (RR 1.10, 95% CI 0.68, 1.81 and RR 0.79, 95% CI 0.46, 1.35, for Waterlow and Ramstadius respectively) (Webster 2011<sup>83</sup>).</li> <li>• The modified version of the Norton scale with use of preventive interventions is associated with lower risk of PIs compared with clinical judgment (RR 0.11, 95% CI 0.03, 0.46) (Bale 1995<sup>88</sup>).</li> <li>• No difference in risk of PIs when one of three interventions was used (22% vs. 22% vs. 15%, <math>p=0.38</math> for nurse training+mandatory Braden scale, nurse training+optional Braden scale and no training respectively) (Saleh 2009<sup>84</sup>).</li> </ul> |



| Review author (publication year)            | Tools included                                            | Setting of included studies; study design; sample size                                                                                                                                                                                                   | Included outcomes                         | Brief description of study quality                                                                                                                                                                                                                                                          | Relevant results from included studies                                                                                                                                                                                                                                                                                                                                                                                                                                                                                                                                                                                                                                                                                                                                                                                                                                                                                                                                                                              |
|---------------------------------------------|-----------------------------------------------------------|----------------------------------------------------------------------------------------------------------------------------------------------------------------------------------------------------------------------------------------------------------|-------------------------------------------|---------------------------------------------------------------------------------------------------------------------------------------------------------------------------------------------------------------------------------------------------------------------------------------------|---------------------------------------------------------------------------------------------------------------------------------------------------------------------------------------------------------------------------------------------------------------------------------------------------------------------------------------------------------------------------------------------------------------------------------------------------------------------------------------------------------------------------------------------------------------------------------------------------------------------------------------------------------------------------------------------------------------------------------------------------------------------------------------------------------------------------------------------------------------------------------------------------------------------------------------------------------------------------------------------------------------------|
| Health Quality Ontario <sup>57</sup> (2009) | Norton; Norton modified by Bale; Norton modified by Ek 97 | Hip fracture inpatients n=1, palliative care/hospice n=1, neurosurgery, general medicine, orthopaedic, and oncology units n=1;<br><br>Design: prospective controlled (contemporaneous controls) n=1, before-and-after n=1;<br><br>Sample size 124 to 223 | PI incidence; PI preventive interventions | RoB assessment criteria name not given. Two studies met 6/8 and one study met all quality assessment requirements. In the studies that didn't meet all requirements, there were blinding and loss to follow-up issues. One study used a version of the Norton scale that was not validated. | <ul style="list-style-type: none"> <li>• Compared a strategy that gave high-risk patients (based on modified Norton score) a risk alarm sticker to standard care. No significant difference between the groups in the incidence of PIs (Gunningberg 1999<sup>87</sup>).</li> <li>• Compared a strategy where patients received a pressure support system allocated according to the modified Norton scale to one where the nurse chose whether to give a special mattress. Using the scale significantly reduced the incidence of PIs (22.4% vs. 2.5%, p&lt;0.001) (Bale 1995<sup>88</sup>).</li> <li>• Compared the Norton scale with training to standard care. There was a significant difference in the number of preventive interventions (18.96 vs. 10.75, for Norton and usual care respectively). Interventions were used earlier for Norton vs. usual care (on day 1, 61% vs. 50%, p&lt;0.002). No significant difference in the incidence of PIs between the groups (Hodge 1990<sup>89</sup>).</li> </ul> |

450

451

AHRQ – Agency for Healthcare Research; CASP – Critical Appraisal Skills Checklist; CI – confidence interval; ICU – intensive care unit; JBI – Joanna Briggs Institute; PI – pressure injury; RCT – randomised controlled trial; RoB – risk of bias; RR – Risk Ratio; S.S. – Suriadi Sanada Scale.

## 452 DISCUSSION

453 This umbrella review summarises data from a total of 26 systematic reviews of studies evaluating the  
454 prognostic accuracy and clinical effectiveness of a total of 70 PI risk prediction tools. Despite the  
455 large number of available reviews, quality assessment using an adaptation of AMSTAR-2 suggested  
456 that the majority were conducted to a relatively poor standard or did not meet reporting standards  
457 for systematic reviews.<sup>19 90</sup> Of the 15 AMSTAR-2 items assessed, only two (for accuracy reviews) and  
458 four (for effectiveness reviews) criteria were more consistently met (more than 60% of reviews  
459 scoring 'Yes'). Whilst AMSTAR-2 Item 6 (data extraction independent in duplicate) was fulfilled by  
460 over half of all reviews (15/26, 58%), and Item 14 (adequate heterogeneity investigation) was fulfilled  
461 by around half of the accuracy reviews (10/19, 53%), all other criteria were fully met by less than half  
462 of the reviews. The primary studies included in the reviews were particularly poorly described in the  
463 accuracy reviews, making it difficult to determine exactly what was evaluated and in whom. The  
464 extent to which we could reliably describe and comment on the content of the reviews is limited and  
465 high-quality evidence for the accuracy and clinical effectiveness of PI risk prediction tools may be  
466 lacking.

### 467 Prognostic accuracy of risk prediction tools

468 Of the 19 reviews reporting the accuracy of included tools, only two used appropriate methods for  
469 both quality assessment and statistical synthesis of accuracy data<sup>41 53</sup>, one of which<sup>41</sup> evaluated only  
470 the Braden scale. Only two reviews<sup>42 43</sup> pre-specified the exclusion of studies reporting accuracy data  
471 from tool development studies, one review restricted to "validated risk assessment instruments"  
472 only<sup>38</sup> and one review<sup>47</sup> was limited to development studies only. This was the only review<sup>47</sup>, that  
473 discussed the importance of appropriate validation of prediction tools. Only two reviews conducted  
474 meta-analyses at different cut-offs for determination of high risk<sup>38 41</sup>; the remaining reviews  
475 combined data regardless of the threshold used. Combining data across different thresholds to  
476 estimate summary sensitivity and specificity yields clinically uninterpretable and non-generalisable  
477 estimates that do not relate to a particular threshold.<sup>35</sup> Only one review<sup>38</sup> considered timing in their  
478 inclusion criteria or in the description of primary studies. It is important to interpret the findings  
479 below with these limitations in mind.

480 The included meta-analyses consistently suggested that risk prediction scales have moderate  
481 sensitivities and somewhat lower specificities, typically in the range of around 70% to 85% for  
482 sensitivity and as low as 30% to 40% for specificity for some tools. Although these ranges in  
483 sensitivities and specificities would be considered on the lower end of acceptable within a diagnostic  
484 accuracy paradigm, they may have greater utility in a prognostic context. Without a detailed review  
485 of the primary study publications for these tools, it is not possible to assess which, if any, of these  
486 risk assessment scales might outperform the others. It seems that limited comparative studies  
487 comparing the accuracy of different tools are available.

488 For the ML-based models, one review<sup>47</sup> combined multiple ML models into one meta-analysis and  
489 another<sup>48</sup> meta-analysed accuracy data by algorithm type. The results of the latter meta-analyses are  
490 not informative for clinical practice but may be a useful way of identifying which ML algorithms may  
491 be more suited to the data. Results suggested that specificities for random forest or decision tree  
492 models could reach 90% or above with associated sensitivities in the range of 66% to 72%, however  
493 relatively wide confidence intervals around these summary estimates reflect considerable variation  
494 in model performance. Moreover, some of these estimates came from internal validations within  
495 model development studies, and may not be transferable to other settings.<sup>91</sup> Authors should make it  
496 clear where accuracy estimates are derived from to avoid overinterpretation of results.

497 Diagnostic accuracy studies are typically cross-sectional in the sense that there should be no, or only  
498 minimal delay between application of the test and the reference standard.<sup>92 93</sup> For prognostic  
499 accuracy however, there is a time delay between the application of the test and the outcome that  
500 the tool aims to predict. If the use of an accurate PI risk prediction tool is combined with effective  
501 and appropriate preventive measures in those identified as most at risk, the incidence of PI would  
502 decline, reducing the positive predictive value of the original risk assessment and potentially the  
503 sensitivity of the tool.<sup>94</sup> Sensitivity and specificity can be optimised by methods which directly  
504 consider the cost of misclassification, including both the harms associated with applying more  
505 intensive prevention in those with a false positive result and the benefits of preventive measures in  
506 those with a true positive result. One solution to determine the preventive treatment threshold risk  
507 is through net benefit calculations,<sup>95 96</sup> which can be visualised in decision curves and are common in  
508 prognostic research. These calculations can assist in providing a balanced use of resources while  
509 maximising positive health outcomes, such as lowering incidence of PI.

510 It is important to also consider that not all predictors have a causal relationship with the outcome,  
511 therefore, not every predictor will be a clinical risk modifier. Risk assessment tools that allow a more  
512 personalised-risk approach, i.e. that identify and flag predictors that are risk modifiers to the end-  
513 users of the tool, would make predictions more interpretable and actionable. Some such  
514 developments exist,<sup>97 98</sup> but future validation of these methods is needed. Where risk assessment  
515 tools are developed for enriching study design (for example, as a means of recruiting only high-risk  
516 patients to studies evaluating preventive measures), a different approach and optimisation of  
517 performance metrics would be needed. Risk prediction models should therefore pre-specify their  
518 intended application before development to allow their clinical utility for a given context to be  
519 addressed.<sup>99</sup>

#### 520 Clinical effectiveness of risk prediction scales

521 Prediction models, like any test used for diagnostic or prognostic purposes, require evaluation in the  
522 care pathway to identify the extent to which their use can impact on health outcomes.<sup>100</sup> Of the 11  
523 reviews assessing clinical effectiveness of PI risk prediction tools, the only primary studies suggesting  
524 potential patient benefits from the use of risk prediction tools<sup>85 88 89</sup> were non-randomised and are  
525 likely to be at high risk of bias. In contrast, two randomised trials<sup>83 84</sup> (both considered at high risk of  
526 bias by the Cochrane review<sup>61</sup>) suggest that use of structured risk assessment tools does not  
527 ultimately lead to the reduction in incidence of PIs. We should recognise that effectiveness outcomes  
528 from using a risk prediction tool depend on the timely implementation of effective preventive  
529 measures, a step that is frequently poorly described in studies evaluating the effectiveness of risk  
530 assessment tools, restricting the conclusions that can be drawn from the limited evidence available.  
531 One possible explanation for the lack of differences in PI incidence is the implementation of  
532 preventive measures that have not been proven effective in preventing PIs, such as alternating air-  
533 mattresses.<sup>4</sup> All reviews included studies that assessed the use of risk assessment scales developed  
534 by clinical experts, and no evidence is available evaluating the clinical effectiveness of empirically  
535 derived prediction models or ML algorithms.

#### 536 Other existing evidence

537 We have separately reviewed<sup>7</sup> available evidence for the development and validation of risk  
538 prediction tools for PI occurrence. Almost half (60/124, 48%) of available tools were developed using  
539 ML methods (as defined by review authors), 37% (46/124) were based on clinical expertise or  
540 unclear methods, and only 18 (15%) were identified as having used statistical modelling methods.  
541 The reviews varied in methodological quality and reporting; however, the reporting of prediction  
542 model development in the original primary studies appears to be poor. For example, across all

543 prediction tools identified, the internal validation approach was unclear and unidentifiable for 72%  
544 (89/124) of tools, and only one review<sup>101</sup> identified and included external validation studies (n=7  
545 studies).

546 ML-based models may have potential for identifying those at risk of PI, as suggested by two reviews<sup>47</sup>  
547 <sup>48</sup> included in this umbrella review. However, it is important to consider the lack of transparency in  
548 reporting of model development methods and model performance, and the concerning lack of  
549 model validation in populations outside of the original model development sample.<sup>7</sup>

#### 550 Strengths and limitations

551 We have conducted the first umbrella review that summarises the prognostic accuracy and clinical  
552 effectiveness of prediction tools for risk of PI. We followed Cochrane guidance<sup>18</sup>, with a highly  
553 sensitive search strategy designed by an experienced information specialist. Although we excluded  
554 non-English publications due to time and resource constraints, where possible these publications  
555 were used to identify additional eligible risk prediction tools.

556 To some extent, our review is limited by the use of AMSTAR-2 for quality assessment of included  
557 reviews. AMSTAR-2 was not designed for assessing systematic reviews of diagnostic or prognostic  
558 studies. Although we made some adaptations, many of the existing and amended criteria relate to  
559 the quality of reporting of the reviews as opposed to methodological quality. There is scope for  
560 further work to establish criteria for assessing systematic reviews of prediction tools. Additionally, we  
561 chose not to exclude reviews based on low AMSTAR-2 ratings to provide a comprehensive overview  
562 of all available evidence. However, by doing so, we acknowledge that many included reviews are of  
563 poor quality (with critically low confidence in 81%, 21/26, reviews), reducing the reliability of the  
564 evidence presented and the ability to make conclusions or recommendations based on this evidence.

565 The primary limitation of our study lies in the limited detail available on risk prediction tools and  
566 their performance within the included systematic reviews. To ensure comprehensive model  
567 identification, we adopted a broad definition of 'systematic', potentially influencing the depth of  
568 information provided in the reviews, and the reporting quality in many primary studies contributing  
569 to these reviews may be suboptimal.

570 Although standards for reporting of test accuracy studies have been available since the year 2000,<sup>92</sup>  
571 standards for reporting risk prediction models were not published until 2015.<sup>102</sup> Similarly, quality  
572 assessment tools highlighting important areas for consideration in primary studies have been  
573 available for DTA studies since 2003, with an adaption to prognostic accuracy published in 2022,<sup>103</sup>  
574 and PROBAST for prediction model studies in 2019.<sup>33</sup> This lag in methodological developments for  
575 studies and systematic reviews of risk prediction tools has likely contributed to the observed  
576 emphasis on the application of DTA principles in our set of reviews, without sufficient consideration  
577 of the prognostic context and effect on accuracy of intervening and effective preventive  
578 interventions.

579 While 18/19 (95%) accuracy reviews aimed to evaluate the 'predictive' validity of PI risk assessment  
580 tools, the majority (16/19, 84%) relied on DTA principles without any consideration of the time  
581 interval between the test and the outcome, i.e. occurrence of PI. This approach does not account for  
582 the prognostic nature of these tools or address longitudinal questions, such as censoring and  
583 competing events.<sup>103</sup> Another fundamental flaw in these accuracy assessments is that risk scales may  
584 actually appear to perform worse in settings where risk prediction and preventive care are most  
585 effective, as accurate risk prediction combined with effective preventive measures may prevent  
586 patients classified as 'high-risk' from developing PIs.<sup>94</sup>

## 587 CONCLUSIONS

588 In conclusion, this umbrella review comprehensively summarises the prognostic accuracy and clinical  
589 effectiveness of risk prediction tools for developing PIs. The included systematic reviews used poor  
590 methodology and reporting, limiting our ability to reliably describe and evaluate their content. ML-  
591 based models demonstrated potential, with high specificity reported for some models. Wide  
592 confidence intervals highlight the variability in current evaluations, and external validation of ML  
593 tools may be lacking. The prognostic accuracy of clinical scales and statistically derived prediction  
594 models has a substantial range of specificities and sensitivities, motivating further model  
595 development with high quality data and appropriate statistical methods.

596 Regarding clinical effectiveness, a reduction of PI incidence is unclear due the overall uncertainty and  
597 potential biases in available studies. This underscores the need for further research in this critical  
598 area, once promising prediction tools have been developed and appropriately validated. In particular,  
599 the clinical impact of newer ML-based models currently remains largely unexplored. Despite these  
600 limitations, our umbrella review provides valuable insights into the current state of PI risk prediction  
601 tools, emphasising the need for robust research methods to be used in future evaluations.

602

## 603 Supporting Information

### 604 **S1 File. Appendices.**

## 605 Acknowledgements

606 We would like to thank Mrs. Rosie Boodell (University of Birmingham, UK) for her help in acquiring  
607 the publications necessary to complete this piece of work.

## 608 Author Contributions

609 **Conceptualisation:** Bethany Hillier, Katie Scandrett, April Coombe, Tina Hernandez-Boussard, Ewout  
610 Steyerberg, Yemisi Takwoingi, Vladica Velickovic, Jacqueline Dinnes

611 **Data curation:** Bethany Hillier, Katie Scandrett, April Coombe, Jacqueline Dinnes

612 **Formal analysis:** Bethany Hillier, Katie Scandrett, Jacqueline Dinnes

613 **Funding acquisition:** Yemisi Takwoingi, Vladica Velickovic, Jacqueline Dinnes

614 **Investigation:** Bethany Hillier, Katie Scandrett, April Coombe, Yemisi Takwoingi, Jacqueline Dinnes

615 **Methodology:** Bethany Hillier, Katie Scandrett, April Coombe, Tina Hernandez-Boussard, Ewout  
616 Steyerberg, Yemisi Takwoingi, Vladica Velickovic, Jacqueline Dinnes

617 **Project administration:** Bethany Hillier, Yemisi Takwoingi, Jacqueline Dinnes

618 **Resources:** Bethany Hillier, Katie Scandrett

619 **Supervision:** Yemisi Takwoingi, Jacqueline Dinnes

620 **Writing – original draft:** Bethany Hillier, Katie Scandrett, April Coombe, Jacqueline Dinnes

621 **Writing – review & editing:** Bethany Hillier, Katie Scandrett, April Coombe, Tina Hernandez-Boussard,  
622 Ewout Steyerberg, Yemisi Takwoingi, Vladica Velickovic, Jacqueline Dinnes

## 623 Funding

624 This work was commissioned and supported by Paul Hartmann AG (Heidenheim, Germany), part of  
625 HARTMANN GROUP. The contract with the University of Birmingham was agreed on the legal  
626 understanding that the authors had the freedom to publish results regardless of the findings.

627 YT, JD and BH are funded by the National Institute for Health and Care Research (NIHR) Birmingham  
628 Biomedical Research Centre (BRC). This paper presents independent research supported by the NIHR  
629 Birmingham BRC at the University Hospitals Birmingham NHS Foundation Trust and the University of  
630 Birmingham. The views expressed are those of the authors and not necessarily those of the NIHR or  
631 the Department of Health and Social Care.

## 632 Conflicting Interests

633 I have read the journal's policy, and the authors of this manuscript have the following competing  
634 interests: VV is an employee of Paul Hartmann AG; ES and THB received consultancy fees from Paul  
635 Hartmann AG. VV, ES and THB were not involved in data curation, screening, data extraction, analysis  
636 of results or writing of the original draft. These roles were conducted independently by authors at  
637 the University of Birmingham. All other authors received no personal funding or personal  
638 compensation from Paul Hartmann AG and have declared that no competing interests exist.

## 639 References

- 640 1. Li Z, Lin F, Thalib L, et al. Global prevalence and incidence of pressure injuries in hospitalised adult  
641 patients: A systematic review and meta-analysis. *International Journal of Nursing Studies*  
642 2020;105:103-546. doi: 10.1016/j.ijnurstu.2020.103546
- 643 2. Padula WV, Delarmente BA. The national cost of hospital-acquired pressure injuries in the United  
644 States. *Int Wound J* 2019;16(3):634-40. doi: 10.1111/iwj.13071 [published Online First:  
645 2019/01/28]
- 646 3. Sullivan N, Schoelles K. Preventing In-Facility Pressure Ulcers as a Patient Safety Strategy. *Annals of*  
647 *Internal Medicine* 2013;158(5.2):410-16. doi: 10.7326/0003-4819-158-5-201303051-00008
- 648 4. Qaseem A, Mir TP, Starkey M, et al. Risk Assessment and Prevention of Pressure Ulcers: A Clinical  
649 Practice Guideline From the American College of Physicians. *Annals of Internal Medicine*  
650 2015;162(5):359-69. doi: 10.7326/m14-1567
- 651 5. Padula WV, Pronovost PJ, Makic MBF, et al. Value of hospital resources for effective pressure injury  
652 prevention: a cost-effectiveness analysis. *BMJ Quality & Safety* 2019;28(2):132.  
653 doi: 10.1136/bmjqs-2017-007505
- 654 6. Institute for Quality and Efficiency in Health Care (IQWiG). Preventing pressure ulcers. Cologne,  
655 Germany 2006 [updated 2018 Nov 15. Available from:  
656 <https://www.ncbi.nlm.nih.gov/books/NBK326430/?report=classic> accessed Feb 2023].
- 657 7. Hillier B, Scandrett K, Coombe A, et al. Development and validation of risk prediction tools for  
658 pressure injury occurrence: An umbrella review (pre-print). *MedRxiv* 2024 doi:  
659 10.1101/2024.05.07.24306999
- 660 8. Braden B, Bergstrom N. A Conceptual Schema for the Study of the Etiology of Pressure Sores.  
661 *Rehabilitation Nursing* 1987;12(1):8-16. doi: 10.1002/j.2048-7940.1987.tb00541.x
- 662 9. Bergstrom N, Braden BJ, Laguzza A, et al. The Braden Scale for Predicting Pressure Sore Risk. *Nurs*  
663 *Res* 1987;36(4):205-10.
- 664 10. Norton D. Geriatric nursing problems. *Int Nurs Rev* 1962;9:39-41.
- 665 11. Waterlow J. Pressure sores: a risk assessment card. *Nursing Times* 1985;81:49-55.
- 666 12. NICE. Pressure ulcers: prevention and management. Clinical guideline [CG179]. 2014 [Available  
667 from: <https://www.nice.org.uk/guidance/cg179> accessed Aug 2024].
- 668 13. Haesler E. European Pressure Ulcer Advisory Panel, National Pressure Injury Advisory Panel and  
669 Pan Pacific Pressure Injury Alliance. Prevention and Treatment of Pressure Ulcers/Injuries:  
670 Clinical Practice Guideline. 2019 [Available from: <https://internationalguideline.com/2019>  
671 accessed Feb 2023].
- 672 14. Scott K, Longstaffe S. Judy Waterlow. 2020 [Available from: <https://litfl.com/judy-waterlow/>  
673 accessed Aug 2024].
- 674 15. Šimundić AM. Measures of Diagnostic Accuracy: Basic Definitions. *EJIFCC* 2009;19(4):203-11.  
675 [published Online First: 2009/01/20]
- 676 16. Leeftang MM, Rutjes AW, Reitsma JB, et al. Variation of a test's sensitivity and specificity with  
677 disease prevalence. *CMAJ* 2013;185(11):E537-44. doi: 10.1503/cmaj.121286 [published  
678 Online First: 2013/06/24]
- 679 17. Maiga A, Farjah F, Blume J, et al. Risk Prediction in Clinical Practice: A Practical Guide for  
680 Cardiothoracic Surgeons. *Ann Thorac Surg* 2019;108(5):1573-82. doi:  
681 10.1016/j.athoracsur.2019.04.126 [published Online First: 2019/06/27]
- 682 18. Pollock M, Fernandes RM BL, Pieper D, Hartling L. Chapter V: Overviews of Reviews. In: Higgins  
683 JPT TJ, Chandler J, Cumpston M, Li T, Page MJ, Welch VA ed. *Cochrane Handbook for*  
684 *Systematic Reviews of Interventions* version 63 (updated February 2022). Available from  
685 [www.training.cochrane.org/handbook](http://www.training.cochrane.org/handbook): Cochrane 2022.
- 686 19. McInnes MDF, Moher D, Thombs BD, et al. Preferred Reporting Items for a Systematic Review and  
687 Meta-analysis of Diagnostic Test Accuracy Studies: The PRISMA-DTA Statement. *JAMA*  
688 2018;319(4):388-96. doi: 10.1001/jama.2017.19163

- 689 20. Ingui BJ, Rogers MA. Searching for clinical prediction rules in MEDLINE. *J Am Med Inform Assoc*  
690 2001;8(4):391-7. doi: 10.1136/jamia.2001.0080391 [published Online First: 2001/06/22]
- 691 21. Wilczynski NL, Haynes RB. Optimal Search Strategies for Detecting Clinically Sound Prognostic  
692 Studies in EMBASE: An Analytic Survey. *Journal of the American Medical Informatics*  
693 *Association* 2005;12(4):481-85. doi: 10.1197/jamia.M1752
- 694 22. Geersing G-J, Bouwmeester W, Zuithoff P, et al. Search Filters for Finding Prognostic and  
695 Diagnostic Prediction Studies in Medline to Enhance Systematic Reviews. *PLOS ONE*  
696 2012;7(2):e32844. doi: 10.1371/journal.pone.0032844
- 697 23. NHS. Pressure ulcers: revised definition and measurement. Summary and recommendations 2018  
698 [Available from: [https://www.england.nhs.uk/wp-content/uploads/2021/09/NSTPP-](https://www.england.nhs.uk/wp-content/uploads/2021/09/NSTPP-summary-recommendations.pdf)  
699 [summary-recommendations.pdf](https://www.england.nhs.uk/wp-content/uploads/2021/09/NSTPP-summary-recommendations.pdf) accessed Feb 2023].
- 700 24. AHCPR. Pressure ulcer treatment. : Agency for Health Care Policy and Research 1994:1-25.
- 701 25. Harker J. Pressure ulcer classification: the Torrance system. *Journal of Wound Care* 2000;9(6):275-  
702 77. doi: 10.12968/jowc.2000.9.6.26233
- 703 26. Moons KGM, de Groot JAH, Bouwmeester W, et al. Critical Appraisal and Data Extraction for  
704 Systematic Reviews of Prediction Modelling Studies: The CHARMS Checklist. *PLOS Medicine*  
705 2014;11(10):e1001744. doi: 10.1371/journal.pmed.1001744
- 706 27. Cochrane. DE form example prognostic models - scoping review: The Cochrane Collaboration: The  
707 Prognosis Methods Group; [Available from: <https://methods.cochrane.org/prognosis/tools>  
708 accessed Feb 2023].
- 709 28. Shea BJ, Reeves BC, Wells G, et al. AMSTAR 2: a critical appraisal tool for systematic reviews that  
710 include randomised or non-randomised studies of healthcare interventions, or both. *BMJ*  
711 2017;358:j4008. doi: 10.1136/bmj.j4008
- 712 29. World Health O. WHO handbook for guideline development: Chapter 17: developing guideline  
713 recommendations for tests or diagnostic tools. 2nd ed. Geneva: World Health Organization  
714 2014:218.
- 715 30. Whiting P, Savović J, Higgins JP, et al. ROBIS: A new tool to assess risk of bias in systematic reviews  
716 was developed. *J Clin Epidemiol* 2016;69:225-34. doi: 10.1016/j.jclinepi.2015.06.005  
717 [published Online First: 20150616]
- 718 31. Whiting P, Rutjes AWS, Reitsma JB, et al. The development of QUADAS: a tool for the quality  
719 assessment of studies of diagnostic accuracy included in systematic reviews. *BMC Med Res*  
720 *Methodol* 2003;3(25) doi: 10.1186/1471-2288-3-25
- 721 32. Whiting PF, Rutjes AW, Westwood ME, et al. QUADAS-2: a revised tool for the quality assessment  
722 of diagnostic accuracy studies. *Ann Intern Med* 2011;155(8):529-36. doi: 10.7326/0003-4819-  
723 155-8-201110180-00009
- 724 33. Wolff RF, Moons KGM, Riley RD, et al. PROBAST: A Tool to Assess the Risk of Bias and Applicability  
725 of Prediction Model Studies. *Annals of Internal Medicine* 2019;170(1):51-58. doi:  
726 10.7326/M18-1376
- 727 34. Macaskill P, Gatsonis C, Deeks J, et al. Cochrane handbook for systematic reviews of diagnostic  
728 test accuracy: Version, 2010.
- 729 35. Macaskill P, Takwoingi Y, Deeks J, et al. Chapter 9: Understanding meta-analysis. In: Deeks J,  
730 Bossuyt P, Leeflang M, et al., eds. *Cochrane Handbook for Systematic Reviews of Diagnostic*  
731 *Test Accuracy*. Version 2.0 ed: Cochrane, 2023 (updated July 2023).
- 732 36. Chen X, Diao D, Ye L. Predictive validity of the Jackson–Cubbin scale for pressure ulcers in  
733 intensive care unit patients: A meta-analysis. *Nursing in Critical Care* 2023;28(3):370-78. doi:  
734 10.1111/nicc.12818
- 735 37. Chen HL, Shen WQ, Liu P. A Meta-analysis to Evaluate the Predictive Validity of the Braden Scale  
736 for Pressure Ulcer Risk Assessment in Long-term Care. *Ostomy/wound management*  
737 2016;62(9):20-8.
- 738 38. Chou R, Dana T, Bougatsos C, et al. Pressure ulcer risk assessment and prevention: a systematic  
739 comparative effectiveness review. *Annals of internal medicine* 2013;159(1):28-38.



- 740 39. García-Fernández FP, Pancorbo-Hidalgo PL, Agreda JJS. Predictive Capacity of Risk Assessment  
741 Scales and Clinical Judgment for Pressure Ulcers: A Meta-analysis. *Journal of Wound Ostomy*  
742 *& Continence Nursing* 2014;41(1):24-34. doi: 10.1097/01.WON.0000438014.90734.a2
- 743 40. He W, Liu P, Chen HL. The Braden Scale cannot be used alone for assessing pressure ulcer risk in  
744 surgical patients: a meta-analysis. *Ostomy/wound management* 2012;58:34-40.
- 745 41. Huang C, Ma Y, Wang C, et al. Predictive validity of the braden scale for pressure injury risk  
746 assessment in adults: A systematic review and meta-analysis. *Nursing open* 2021;8:2194-207.  
747 doi: 10.1002/nop2.792
- 748 42. Mehicic A, Burston A, Fulbrook P. Psychometric properties of the Braden scale to assess pressure  
749 injury risk in intensive care: A systematic review. *Intensive & critical care nursing*  
750 2024;83:103686. doi: 10.1016/j.iccn.2024.103686
- 751 43. Pancorbo-Hidalgo PL, Garcia-Fernandez FP, Lopez-Medina IM, et al. Risk assessment scales for  
752 pressure ulcer prevention: a systematic review. *J Adv Nurs* 2006;54(1):94-110. doi:  
753 10.1111/j.1365-2648.2006.03794.x
- 754 44. Park SH, Lee HS. Assessing Predictive Validity of Pressure Ulcer Risk Scales- A Systematic Review  
755 and Meta-Analysis. *Iranian journal of public health* 2016;45(2):122-33.
- 756 45. Park SH, Lee YS, Kwon YM. Predictive Validity of Pressure Ulcer Risk Assessment Tools for Elderly:  
757 A Meta-Analysis. *Western journal of nursing research* 2016;38:459-83. doi:  
758 10.1177/0193945915602259
- 759 46. Park SH, Choi YK, Kang CB. Predictive validity of the Braden Scale for pressure ulcer risk in  
760 hospitalized patients. *Journal of Tissue Viability* 2015;24:102-13. doi:  
761 10.1016/j.jtv.2015.05.001
- 762 47. Pei J, Guo X, Tao H, et al. Machine learning-based prediction models for pressure injury: A  
763 systematic review and meta-analysis. *Int Wound J* 2023 doi: 10.1111/iwj.14280 [published  
764 Online First: 2023/06/20]
- 765 48. Qu C, Luo W, Zeng Z, et al. The predictive effect of different machine learning algorithms for  
766 pressure injuries in hospitalized patients: A network meta-analyses. *Heliyon*  
767 2022;8(11):e11361. doi: 10.1016/j.heliyon.2022.e11361
- 768 49. Tayyib NAH, Coyer F, Lewis P. Pressure ulcers in the adult intensive care unit: a literature review of  
769 patient risk factors and risk assessment scales. *Journal of Nursing Education and Practice*  
770 2013;3(11):28-42.
- 771 50. Wang N, Lv L, Yan F, et al. Biomarkers for the early detection of pressure injury: A systematic  
772 review and meta-analysis. *Journal of Tissue Viability* 2022;31:259-67. doi:  
773 10.1016/j.jtv.2022.02.005
- 774 51. Wei M, Wu L, Chen Y, et al. Predictive Validity of the Braden Scale for Pressure Ulcer Risk in  
775 Critical Care: A Meta-Analysis. *Nursing in critical care* 2020;25:165-70. doi:  
776 10.1111/nicc.12500
- 777 52. Wilchesky M, Lungu O. Predictive and concurrent validity of the Braden scale in long-term care: A  
778 meta-analysis. *Wound Repair and Regeneration* 2015;23:44-56. doi: 10.1111/wrr.12261
- 779 53. Zhang Y, Zhuang Y, Shen J, et al. Value of pressure injury assessment scales for patients in the  
780 intensive care unit: Systematic review and diagnostic test accuracy meta-analysis. *Intensive &*  
781 *critical care nursing* 2021;64:103009. doi: 10.1016/j.iccn.2020.103009
- 782 54. Zimmermann GS, Cremasco MF, Zanei SSV, et al. Pressure injury risk prediction in critical care  
783 patients: an integrative review. *Texto & Contexto-Enfermagem* 2018;27(3)
- 784 55. Baris N, Karabacak BG, Alpar SE. The Use of the Braden Scale in Assessing Pressure Ulcers in  
785 Turkey: A Systematic Review. *Advances in skin & wound care* 2015;28:349-57. doi:  
786 10.1097/01.ASW.0000465299.99194.e6
- 787 56. Gaspar S, Peralta M, Marques A, et al. Effectiveness on hospital-acquired pressure ulcers  
788 prevention: a systematic review. *International Wound Journal* 2019;16(5):1087-102. doi:  
789 10.1111/iwj.13147

- 790 57. Ontario HQ. Pressure ulcer prevention: an evidence-based analysis. *Ontario health technology*  
791 *assessment series* 2009;9(2):1-104.
- 792 58. Kottner J, Dassen T, Tannen A. Inter- and intrarater reliability of the Waterlow pressure sore risk  
793 scale: A systematic review. *International Journal of Nursing Studies* 2009;46:369-79. doi:  
794 10.1016/j.ijnurstu.2008.09.010
- 795 59. Lovegrove J, Ven S, Miles SJ, et al. Comparison of pressure injury risk assessment outcomes using  
796 a structured assessment tool versus clinical judgement: A systematic review. *Journal of*  
797 *Clinical Nursing* 2021 doi: 10.1111/jocn.16154 [published Online First: 2021/12/01]
- 798 60. Lovegrove J, Miles S, Fulbrook P. The relationship between pressure ulcer risk assessment and  
799 preventative interventions: a systematic review. *Journal of wound care* 2018;27(12):862-75.
- 800 61. Moore ZEH, Patton D. Risk assessment tools for the prevention of pressure ulcers. *Cochrane*  
801 *Database of Systematic Reviews* 2019 doi: 10.1002/14651858.CD006471.pub4
- 802 62. Kelly J. Inter-rater reliability and Waterlow's pressure ulcer risk assessment tool. *Nurs Stand*  
803 2005;19(32):86-7, 90-2. doi: 10.7748/ns2005.04.19.32.86.c3851
- 804 63. Munoz N, Posthauer ME. Nutrition strategies for pressure injury management: Implementing the  
805 2019 International Clinical Practice Guideline. *Nutrition in Clinical Practice* 2022;37(3):567-  
806 82.
- 807 64. Higgins JPT, Altman DG, Gøtzsche PC, et al. The Cochrane Collaboration's tool for assessing risk of  
808 bias in randomised trials. *BMJ* 2011;343:d5928. doi: 10.1136/bmj.d5928
- 809 65. AHRQ Methods for Effective Health Care. Methods Guide for Effectiveness and Comparative  
810 Effectiveness Reviews. Rockville (MD): Agency for Healthcare Research and Quality (US)  
811 2008.
- 812 66. Zahia S, Garcia Zapirain MB, Sevillano X, et al. Pressure injury image analysis with machine  
813 learning techniques: A systematic review on previous and possible future methods. *Artificial*  
814 *Intelligence in Medicine* 2020;102:101742. doi: 10.1016/j.artmed.2019.101742
- 815 67. Song M, Choi KS. Factors predicting development of decubitus ulcers among patients admitted  
816 for neurological problems. *The Journal of Nurses Academic Society* 1991;21(1):16-26.
- 817 68. Pang SM, Wong TK. Predicting pressure sore risk with the Norton, Braden, and Waterlow scales in  
818 a Hong Kong rehabilitation hospital. *Nursing Research* 1998;47(3):147-53.
- 819 69. Cubbin B, Jackson C. Trial of a pressure area risk calculator for intensive therapy patients.  
820 *Intensive Care Nursing* 1991;7(1):40-44.
- 821 70. González-Ruiz J, Carrero AG, Blázquez MH, et al. Factores de riesgo de las úlceras por presión en  
822 pacientes críticos. *Enfermería Clínica* 2001;11(5):184-90.
- 823 71. Kwong E, Pang S, Wong T, et al. Predicting pressure ulcer risk with the modified Braden, Braden,  
824 and Norton scales in acute care hospitals in Mainland China. *Appl Nurs Res* 2005;18(2):122-8.  
825 doi: 10.1016/j.apnr.2005.01.001
- 826 72. Halfens R, Van Achterberg T, Bal R. Validity and reliability of the Braden scale and the influence of  
827 other risk factors: a multi-centre prospective study. *International Journal of Nursing Studies*  
828 2000;37(4):313-19.
- 829 73. Ek AC. Prediction of pressure sore development. *Scand J Caring Sci* 1987;1(2):77-84. doi:  
830 10.1111/j.1471-6712.1987.tb00603.x
- 831 74. Bienstein C. Risikopatienten erkennen mit der erweiterten Nortonskala [Risk patients detected  
832 with the extended Norton scale]. *Dekubitus - Prophylaxe und Therapie*. Frankfurt/Main:  
833 Verlag Krankenpflege 1991.
- 834 75. Jackson C. The revised Jackson/Cubbin Pressure Area Risk Calculator. *Intensive Crit Care Nurs*  
835 1999;15(3):169-75. doi: 10.1016/s0964-3397(99)80048-2
- 836 76. Fuentelsaz C. Validation of the EMINA scale: tool for the evaluation of risk of developing pressure  
837 ulcers in hospitalized patients. *Enferm Clin [Internet]* 2001;11(3):97-103.
- 838 77. Lowthian P. The practical assessment of pressure sore risk. *Care-Science and Practice*  
839 1987;5(4):3-7.

- 840 78. Lowery MT. A pressure sore risk calculator for intensive care patients: 'the Sunderland  
841 experience'. *Intensive Crit Care Nurs* 1995;11(6):344-53. doi: 10.1016/s0964-3397(95)80452-  
842 8
- 843 79. Lindgren M, Unosson M, Krantz AM, et al. A risk assessment scale for the prediction of pressure  
844 sore development: reliability and validity. *Journal of advanced nursing* 2002;38(2):190-99.
- 845 80. Walter SD. Properties of the summary receiver operating characteristic (SROC) curve for  
846 diagnostic test data. *Stat Med* 2002;21(9):1237-56. doi: 10.1002/sim.1099
- 847 81. Moses LE, Shapiro D, Littenberg B. Combining independent studies of a diagnostic test into a  
848 summary ROC curve: data-analytic approaches and some additional considerations. *Stat Med*  
849 1993;12(14):1293-316. doi: 10.1002/sim.4780121403
- 850 82. Littenberg B, Moses LE. Estimating diagnostic accuracy from multiple conflicting reports: a new  
851 meta-analytic method. *Med Decis Making* 1993;13(4):313-21. doi:  
852 10.1177/0272989x9301300408
- 853 83. Webster J, Coleman K, Mudge A, et al. Pressure ulcers: effectiveness of risk-assessment tools. A  
854 randomised controlled trial (the ULCER trial). *BMJ Quality & Safety* 2011;20(4):297. doi:  
855 10.1136/bmjqs.2010.043109
- 856 84. Saleh M, Anthony D, Parboteeah S. The impact of pressure ulcer risk assessment on patient  
857 outcomes among hospitalised patients. *J Clin Nurs* 2009;18(13):1923-9. doi: 10.1111/j.1365-  
858 2702.2008.02717.x [published Online First: 2009/04/03]
- 859 85. Moore Z, Johansen E, Etten Mv, et al. Pressure ulcer prevalence and prevention practices: a cross-  
860 sectional comparative survey in Norway and Ireland. *Journal of Wound Care* 2015;24(8):333-  
861 39. doi: 10.12968/jowc.2015.24.8.333
- 862 86. Moore Z, Pitman S. Towards establishing a pressure sore prevention and management policy in  
863 an acute hospital setting. *The All Ireland Journal of Nursing and Midwifery* 2000;1(1):7-11.
- 864 87. Gunningberg L, Lindholm C, Carlsson M, et al. Implementation of risk assessment and  
865 classification of pressure ulcers as quality indicators for patients with hip fractures. *J Clin*  
866 *Nurs* 1999;8(4):396-406. doi: 10.1046/j.1365-2702.1999.00287.x
- 867 88. Bale S, Finlay I, Harding KG. Pressure sore prevention in a hospice. *J Wound Care* 1995;4(10):465-  
868 8. doi: 10.12968/jowc.1995.4.10.465
- 869 89. Hodge J, Mounter J, Gardner G, et al. Clinical trial of the Norton Scale in acute care settings. *Aust*  
870 *J Adv Nurs* 1990;8(1):39-46.
- 871 90. Moher D, Liberati A, Tetzlaff J, et al. Preferred Reporting Items for Systematic Reviews and Meta-  
872 Analyses: The PRISMA Statement. *PLOS Medicine* 2009;6(7):e1000097. doi:  
873 10.1371/journal.pmed.1000097
- 874 91. Steyerberg EW, Harrell FE, Jr. Prediction models need appropriate internal, internal-external, and  
875 external validation. *J Clin Epidemiol* 2016;69:245-7. doi: 10.1016/j.jclinepi.2015.04.005  
876 [published Online First: 2015/04/18]
- 877 92. Bossuyt PM, Reitsma JB, Bruns DE, et al. The STARD statement for reporting studies of diagnostic  
878 accuracy: explanation and elaboration. *Ann Intern Med* 2003;138(1):W1-12. doi:  
879 10.7326/0003-4819-138-1-200301070-00012-w1
- 880 93. Reitsma J, Rutjes A, Whiting P, et al. Chapter 8: Assessing risk of bias and applicability. In: Deeks J,  
881 Bossuyt P, Leeflang M, et al., eds. *Cochrane Handbook for Systematic Reviews of Diagnostic*  
882 *Test Accuracy*. Version 2.0 (updated July 2023) ed. Cochrane, 2023.
- 883 94. Deeks JJ, Dealey C. Pressure sore prevention: using and evaluating risk assessment tools. *British*  
884 *Journal of Nursing* 1996;5(5):313-20. doi: 10.12968/bjon.1996.5.5.313
- 885 95. Vickers AJ, Van Calster B, Steyerberg EW. Net benefit approaches to the evaluation of prediction  
886 models, molecular markers, and diagnostic tests. *BMJ* 2016;352:i6. doi: 10.1136/bmj.i6
- 887 96. Trikalinos TA, Siebert U, Lau J. Decision-Analytic Modeling to Evaluate Benefits and Harms of  
888 Medical Tests: Uses and Limitations. *Medical Decision Making* 2009;29(5):E22-E29. doi:  
889 10.1177/0272989X09345022

- 890 97. Dweekat OY, Lam SS, McGrath L. Machine Learning Techniques, Applications, and Potential Future  
891 Opportunities in Pressure Injuries (Bedsore) Management: A Systematic Review.  
892 *International journal of environmental research and public health* 2023;20(1) doi:  
893 10.3390/ijerph20010796
- 894 98. Berlowitz DR, VanDeusen Lukas C, Parker V, et al. 3F: Care Plan. Preventing pressure ulcers in  
895 hospitals: A toolkit for improving quality of care: Agency for Healthcare Research and Quality,  
896 2014:140-42.
- 897 99. Hingorani AD, Windt DAvd, Riley RD, et al. Prognosis research strategy (PROGRESS) 4: Stratified  
898 medicine research. *BMJ : British Medical Journal* 2013;346:e5793. doi: 10.1136/bmj.e5793
- 899 100. Moons KG, Kengne AP, Grobbee DE, et al. Risk prediction models: II. External validation, model  
900 updating, and impact assessment. *Heart* 2012;98(9):691-8. doi: 10.1136/heartjnl-2011-  
901 301247 [published Online First: 2012/03/07]
- 902 101. Shi C, Dumville JC, Cullum N. Evaluating the development and validation of empirically-derived  
903 prognostic models for pressure ulcer risk assessment: A systematic review. *International*  
904 *journal of nursing studies* 2019;89:88-103. doi: 10.1016/j.ijnurstu.2018.08.005
- 905 102. Moons KG, Altman DG, Reitsma JB, et al. Transparent Reporting of a multivariable prediction  
906 model for Individual Prognosis or Diagnosis (TRIPOD): explanation and elaboration. *Ann*  
907 *Intern Med* 2015;162(1):W1-73. doi: 10.7326/m14-0698
- 908 103. Lee J, Mulder F, Leeftang M, et al. QUAPAS: An Adaptation of the QUADAS-2 Tool to Assess  
909 Prognostic Accuracy Studies. *Annals of Internal Medicine* 2022;175(7):1010-18. doi:  
910 10.7326/m22-0276
